# Supplementary material
Source: PubMed Central journal article supplement (PMC3374721)

# Supporting Information

for

## Synthesis of Ureido-Muraymycidine Derivatives for Structure Activity Relationship

### Studies of Muraymycins

Bilal A. Aleiwi, Christopher M. Schneider, and Michio Kurosu\*

Department of Pharmaceutical Sciences, College of Pharmacy, University of Tennessee

Health Science Center, 881 Madison, Memphis, TN 38163-0001, United States

[mkurosu@uthsc.edu](mailto:mkurosu@uthsc.edu)

#### Table of Contents

|                                                                |         |
|----------------------------------------------------------------|---------|
| Table of contents-----                                         | S1      |
| General -----                                                  | S2      |
| 2D NMR spectra for compounds <b>4a</b> and <b>4b</b> -----     | S23-S25 |
| NOESY map for compound <b>4b</b> -----                         | S26     |
| Copies of <sup>1</sup> H and <sup>13</sup> C NMR spectra ----- | S3-S50  |

## General

All reactions were carried out using oven-dried glassware, assembled hot and cooled under a stream of nitrogen before use. Reactions with air sensitive materials were carried out by standard syringe techniques. Commercially available reagents were used as received without further purification. Analytical thin-layer chromatography was performed with 0.25 mm coated commercial silica gel plates (EMD, Silica Gel 60F<sub>254</sub>) visualizing at 254 nm, or developed with ceric ammonium molybdate or anisaldehyde solutions by heating on a hot plate. Specified products were purified by flash column chromatography using silica gel 60 (230-400 mesh, Merck). IR absorptions on NaCl plates were run on a FT-IR 1600 spectrometer. <sup>1</sup>H-NMR spectral data were obtained using 300, 400, and 500 MHz instruments. <sup>13</sup>C NMR spectral data were obtained using a 100, 125 MHz spectrometer. For all NMR spectra,  $\delta$  values are given in ppm and *J* values in Hz.

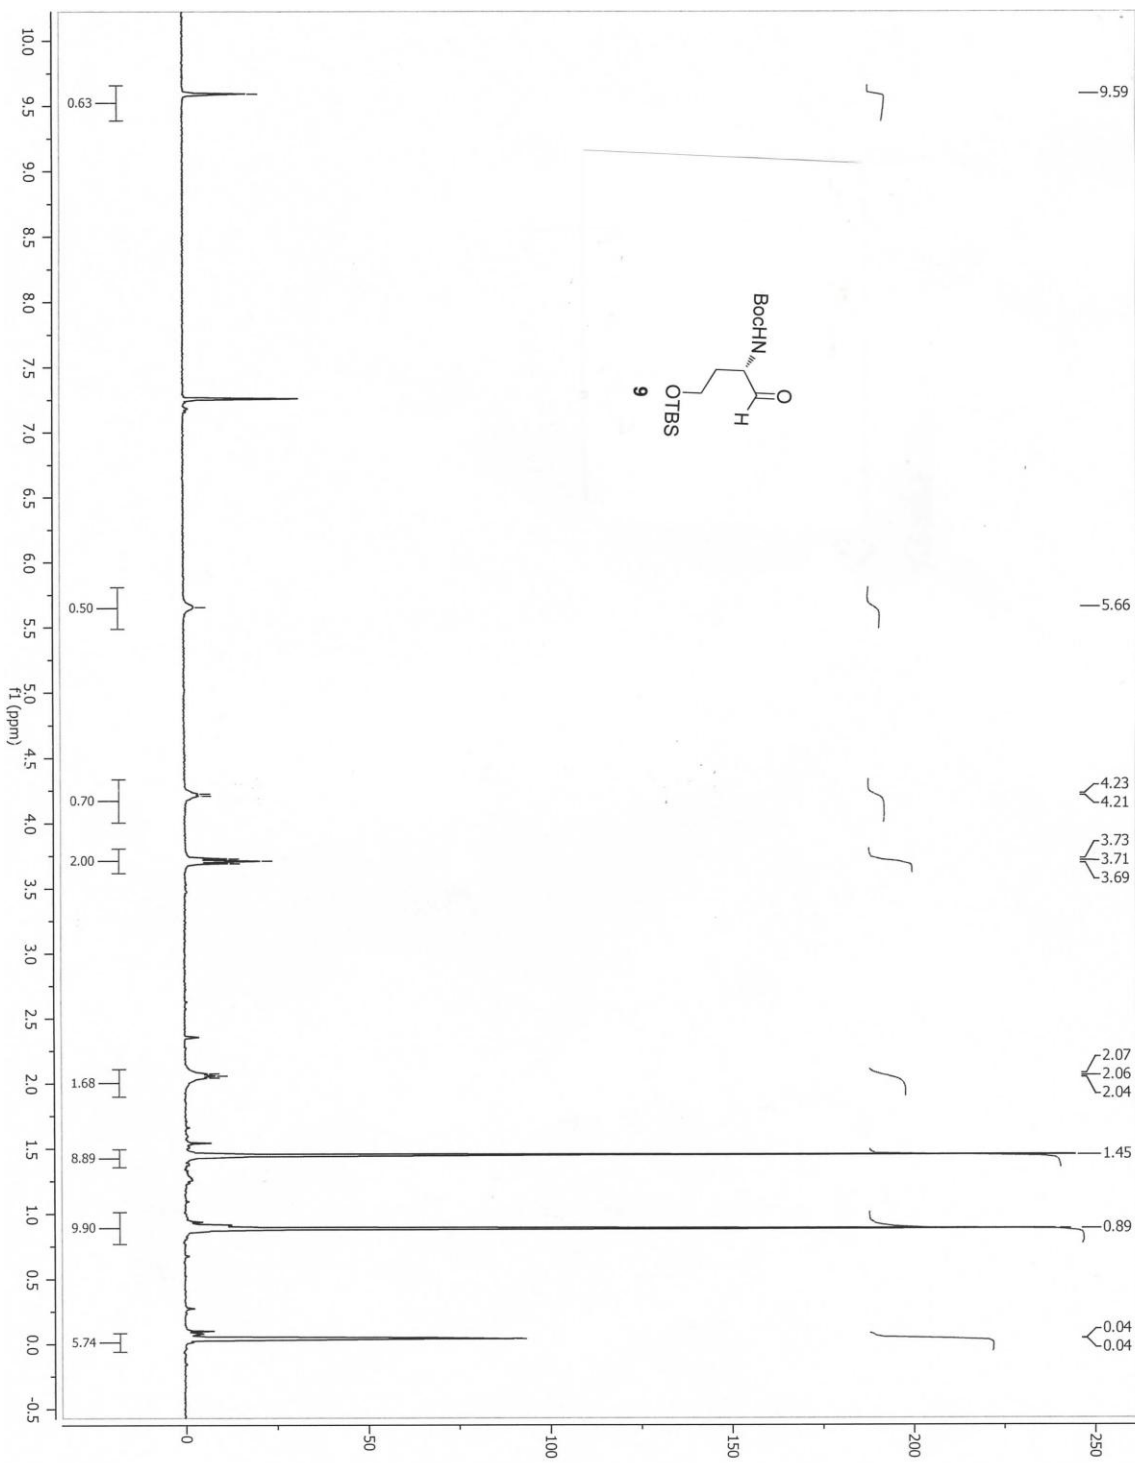



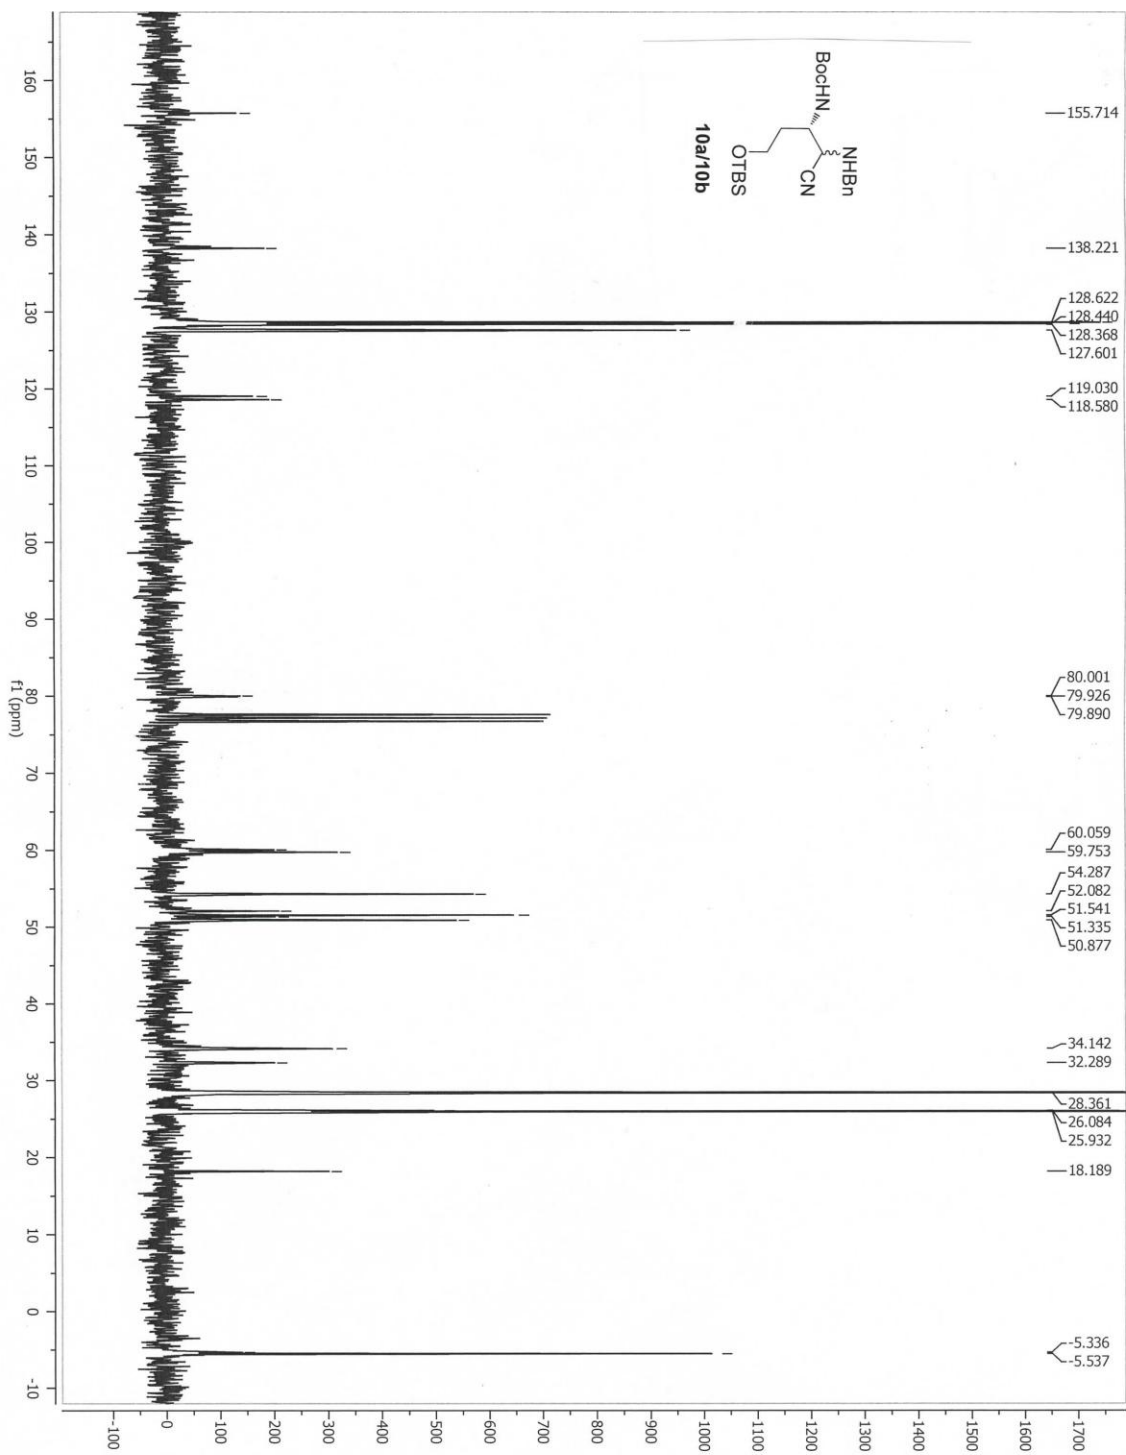

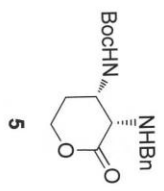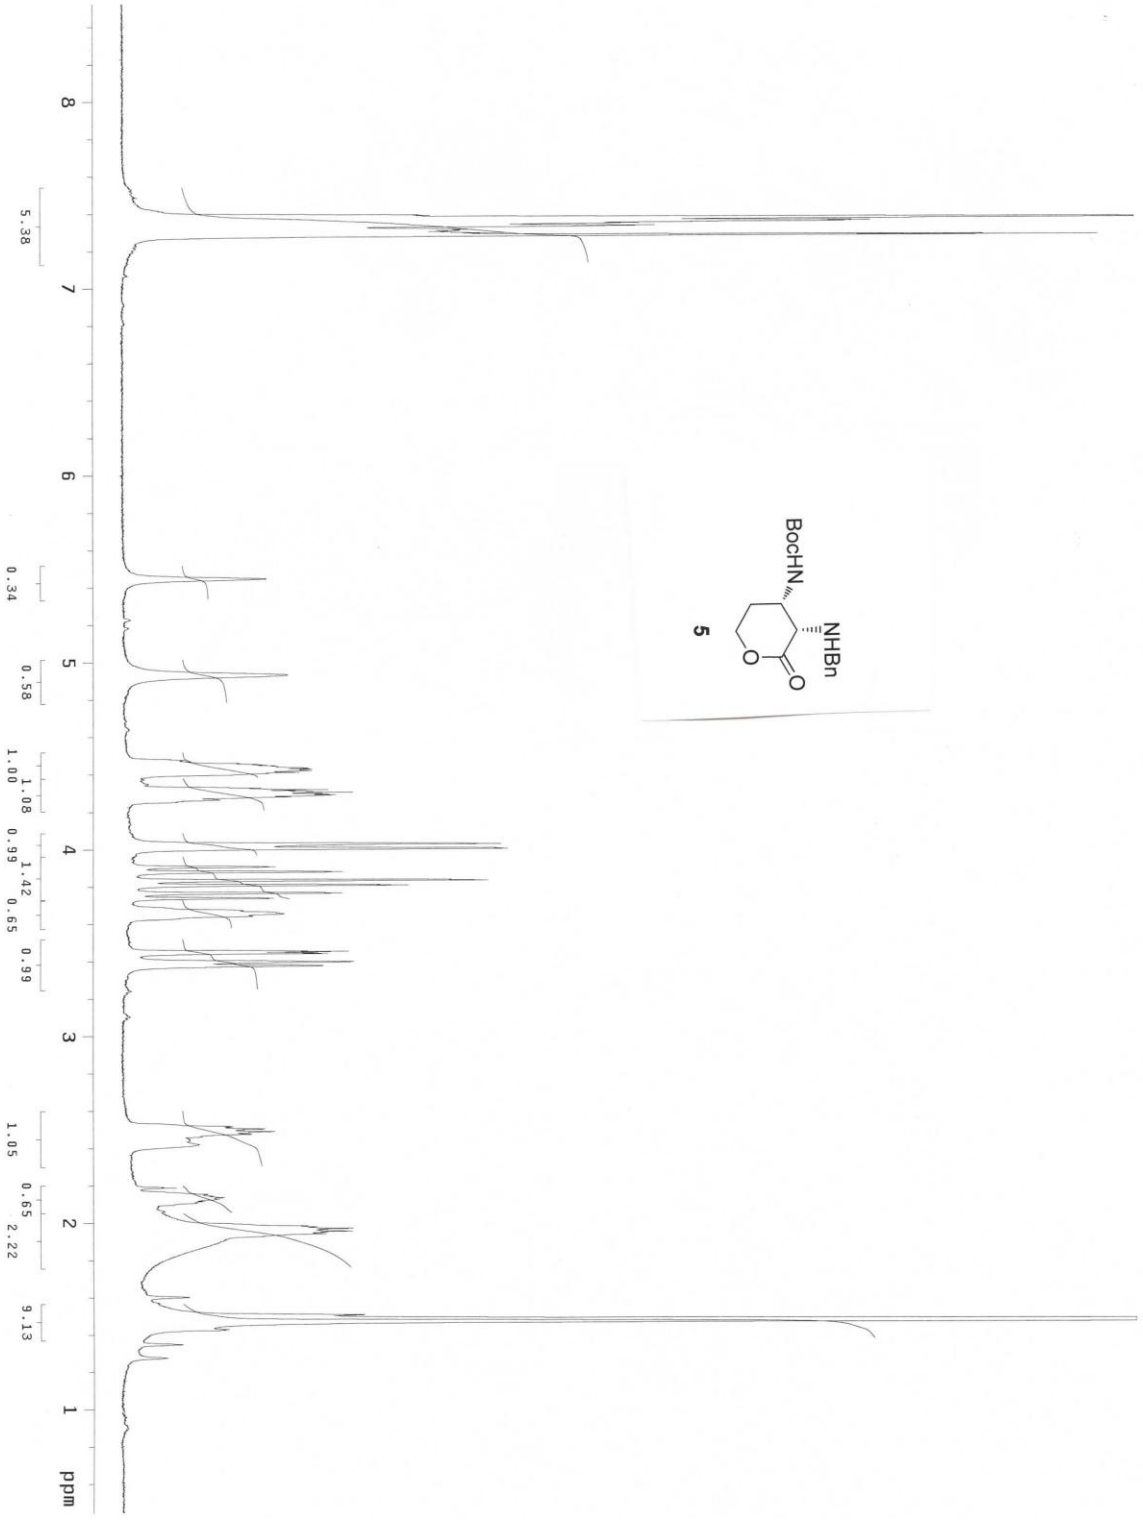

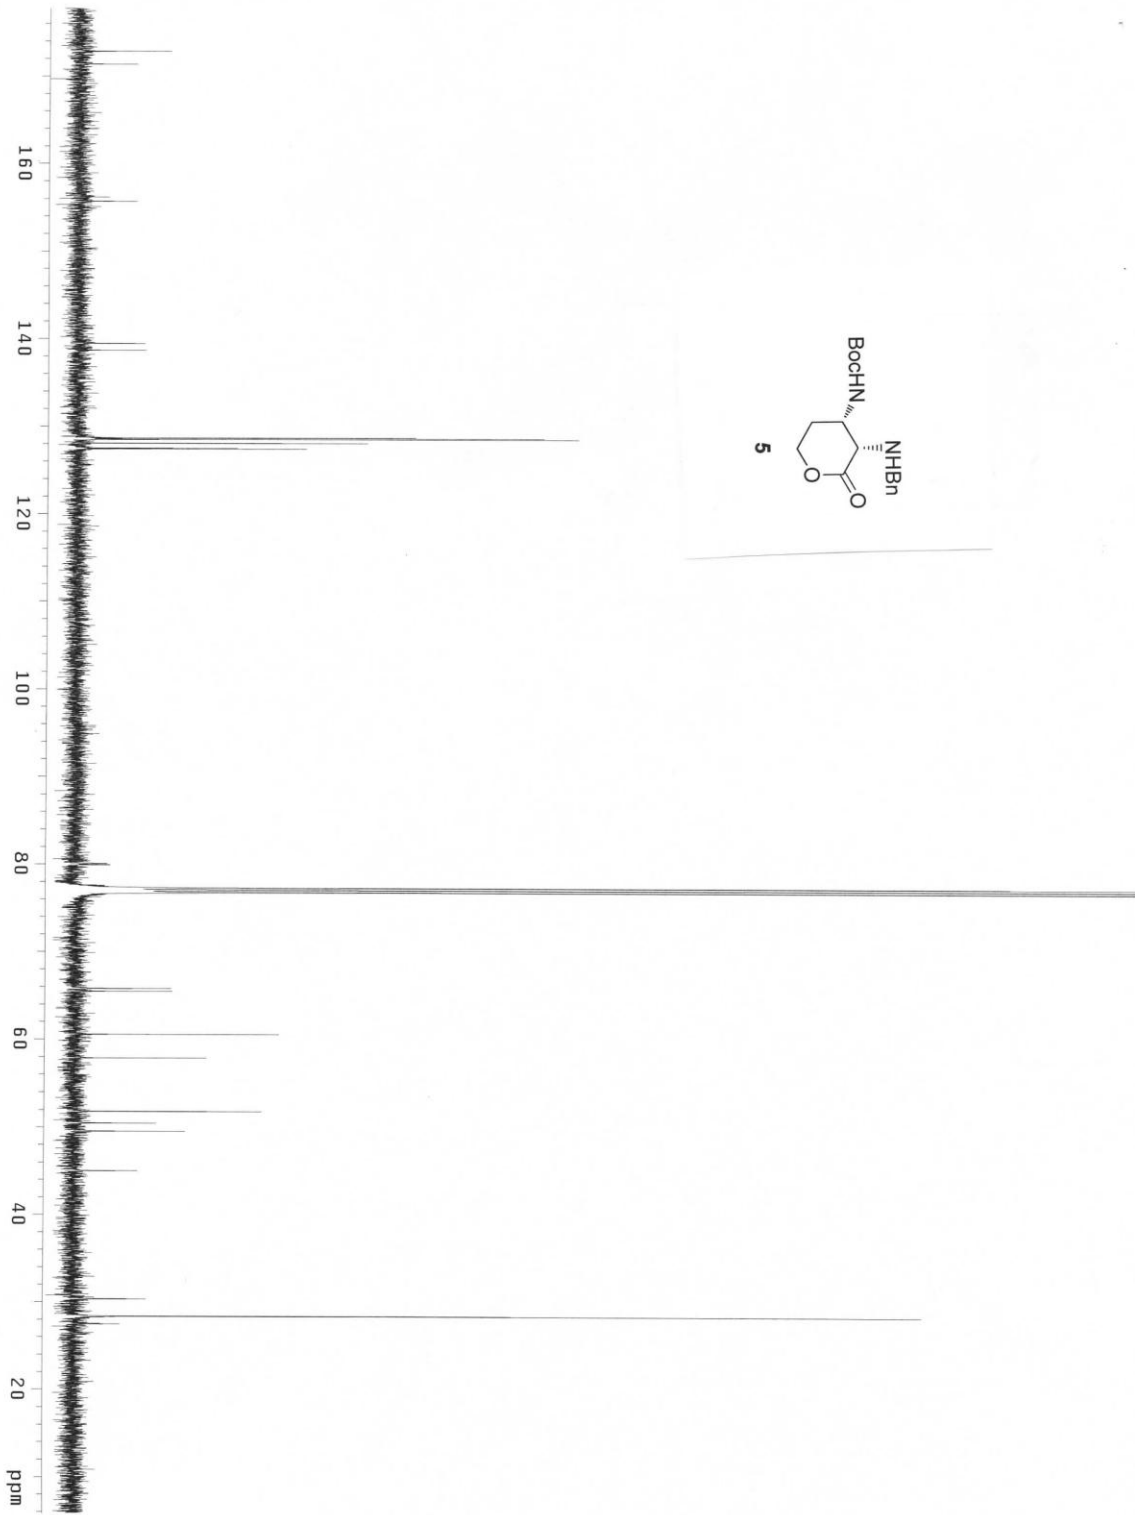

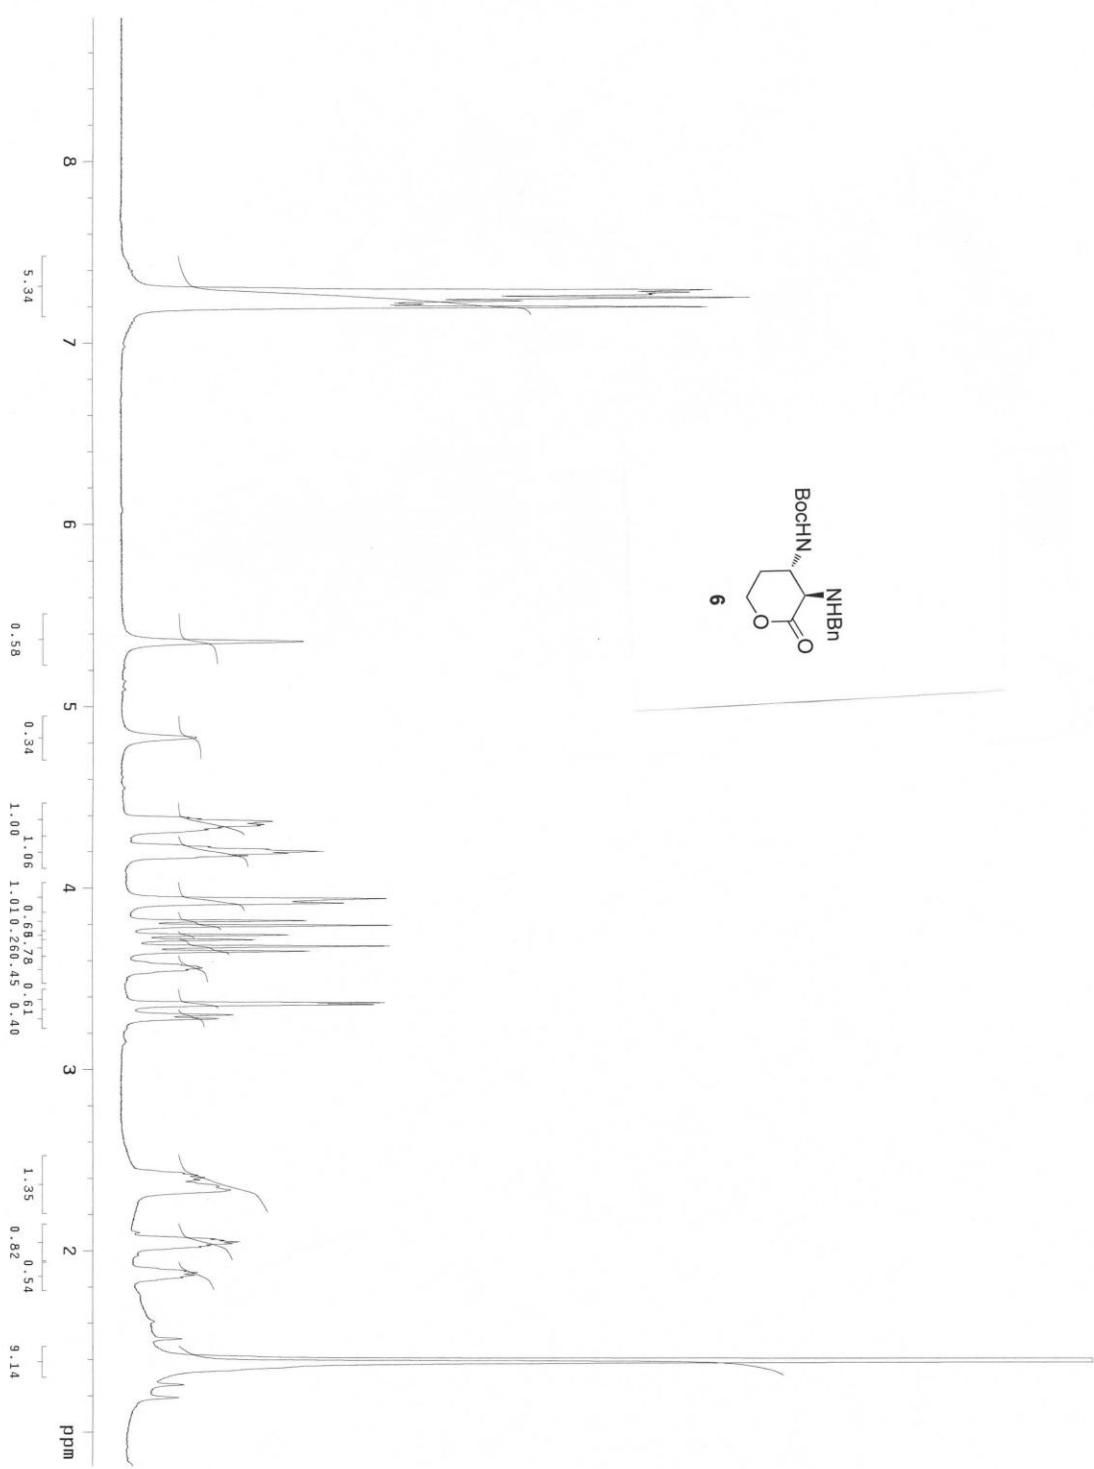



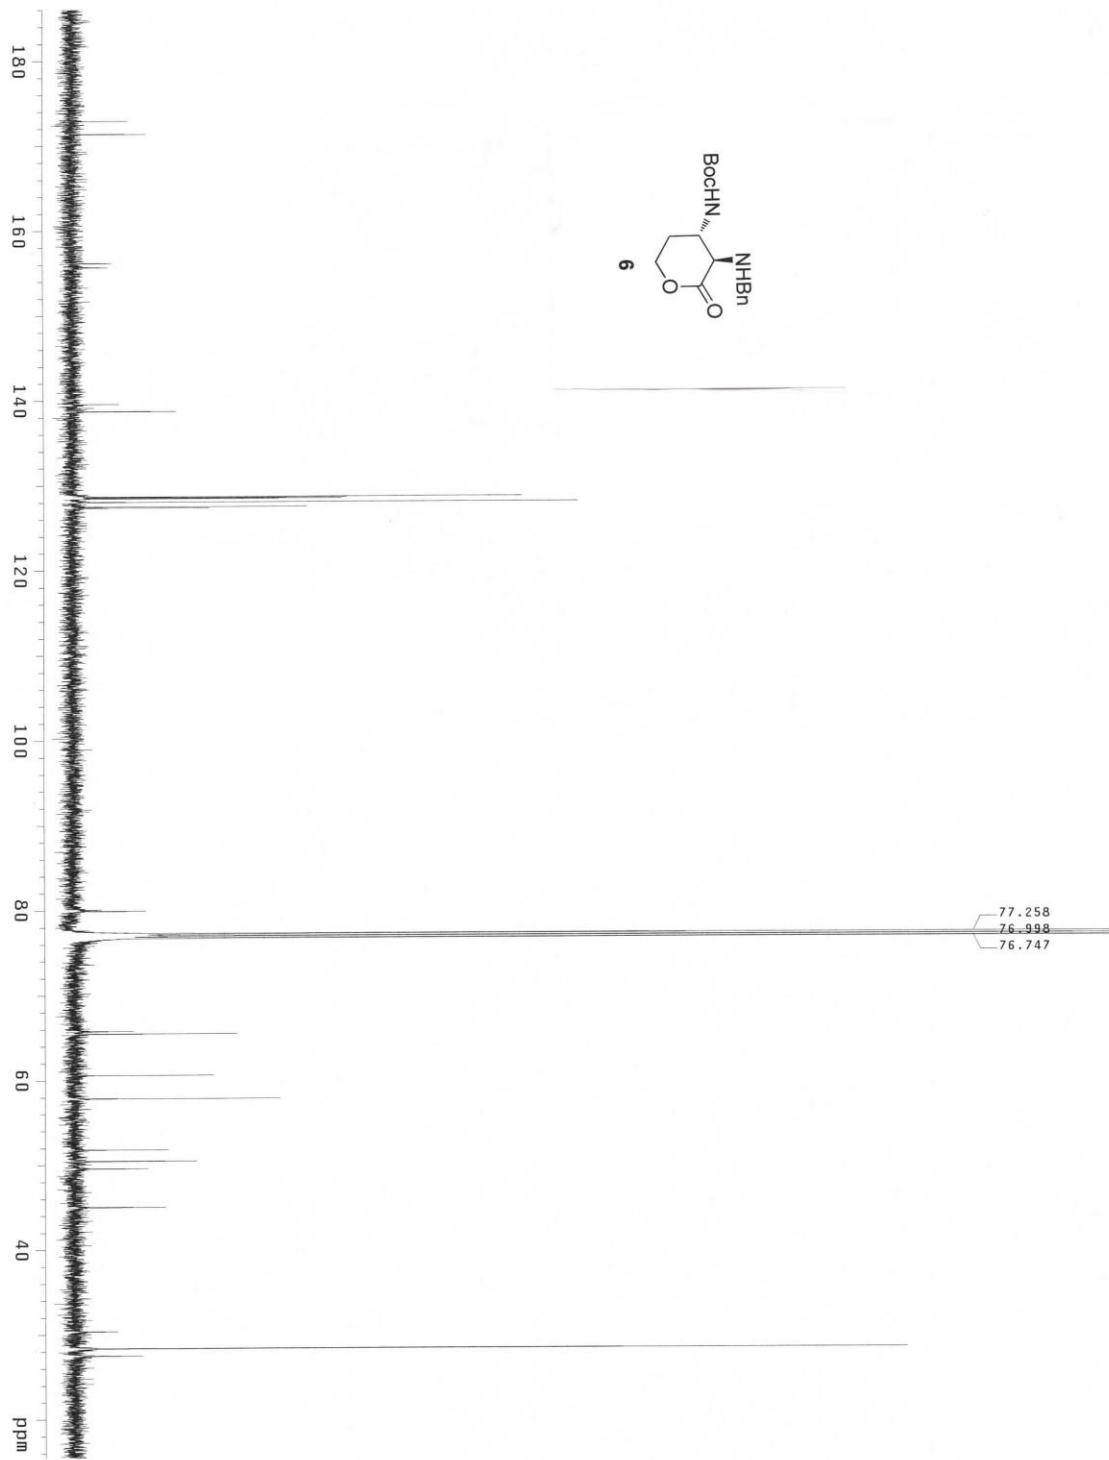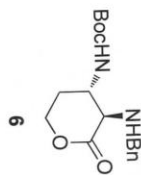

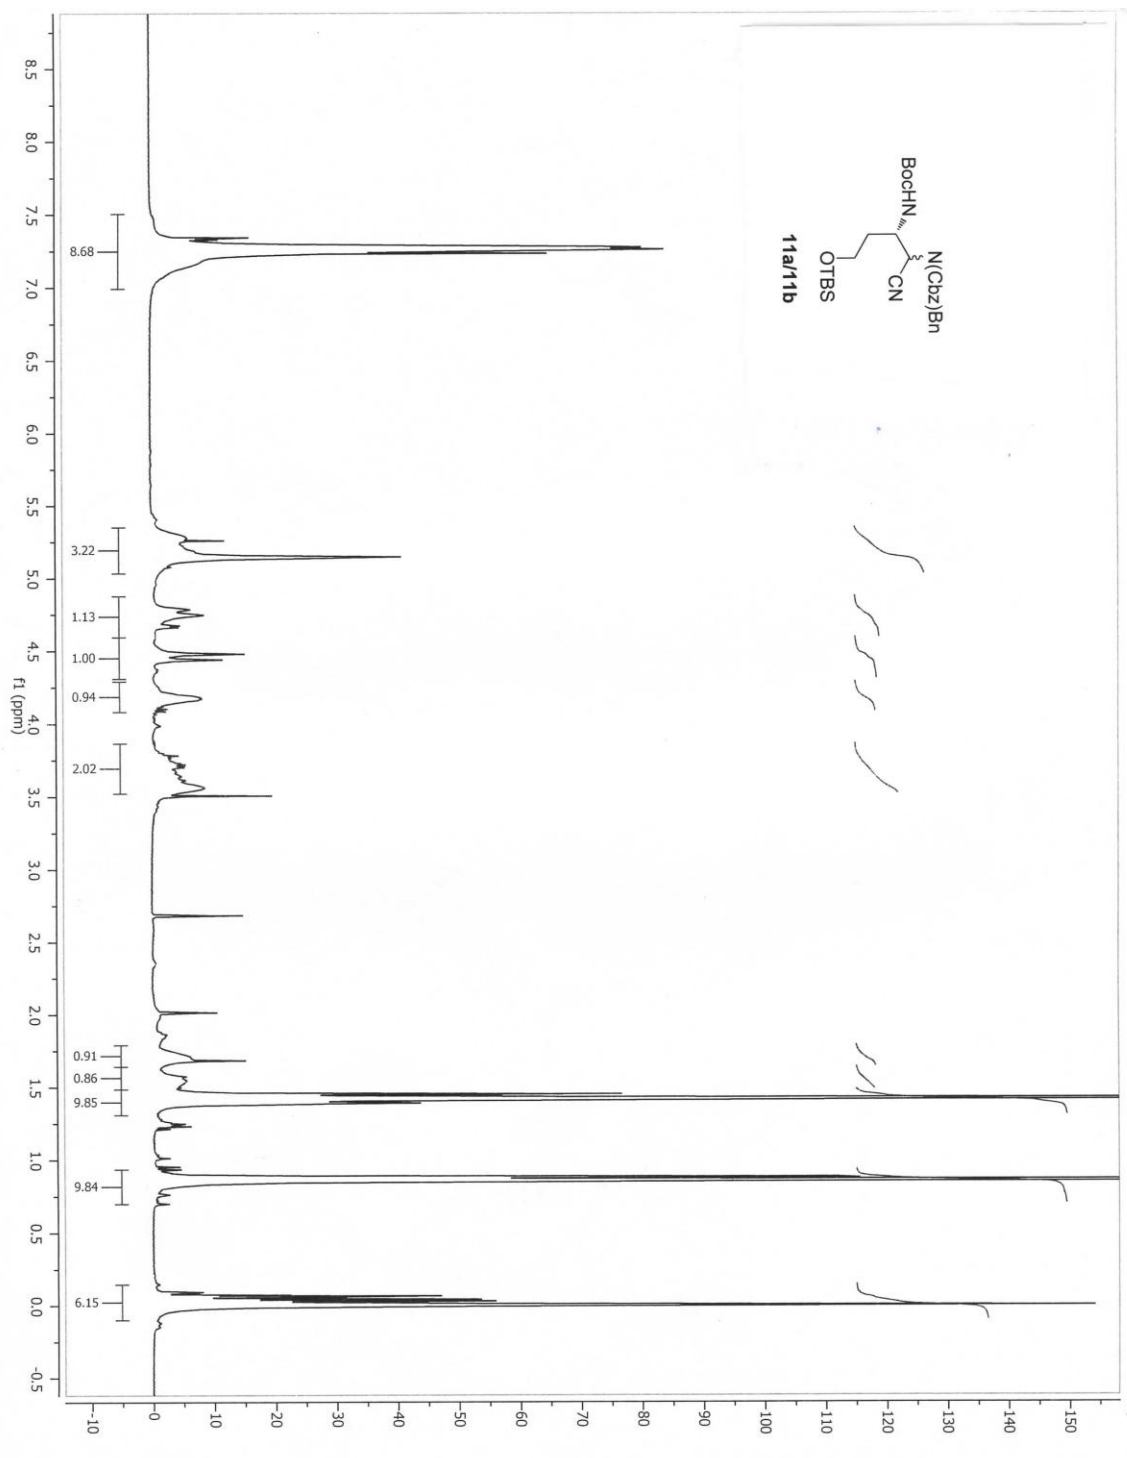









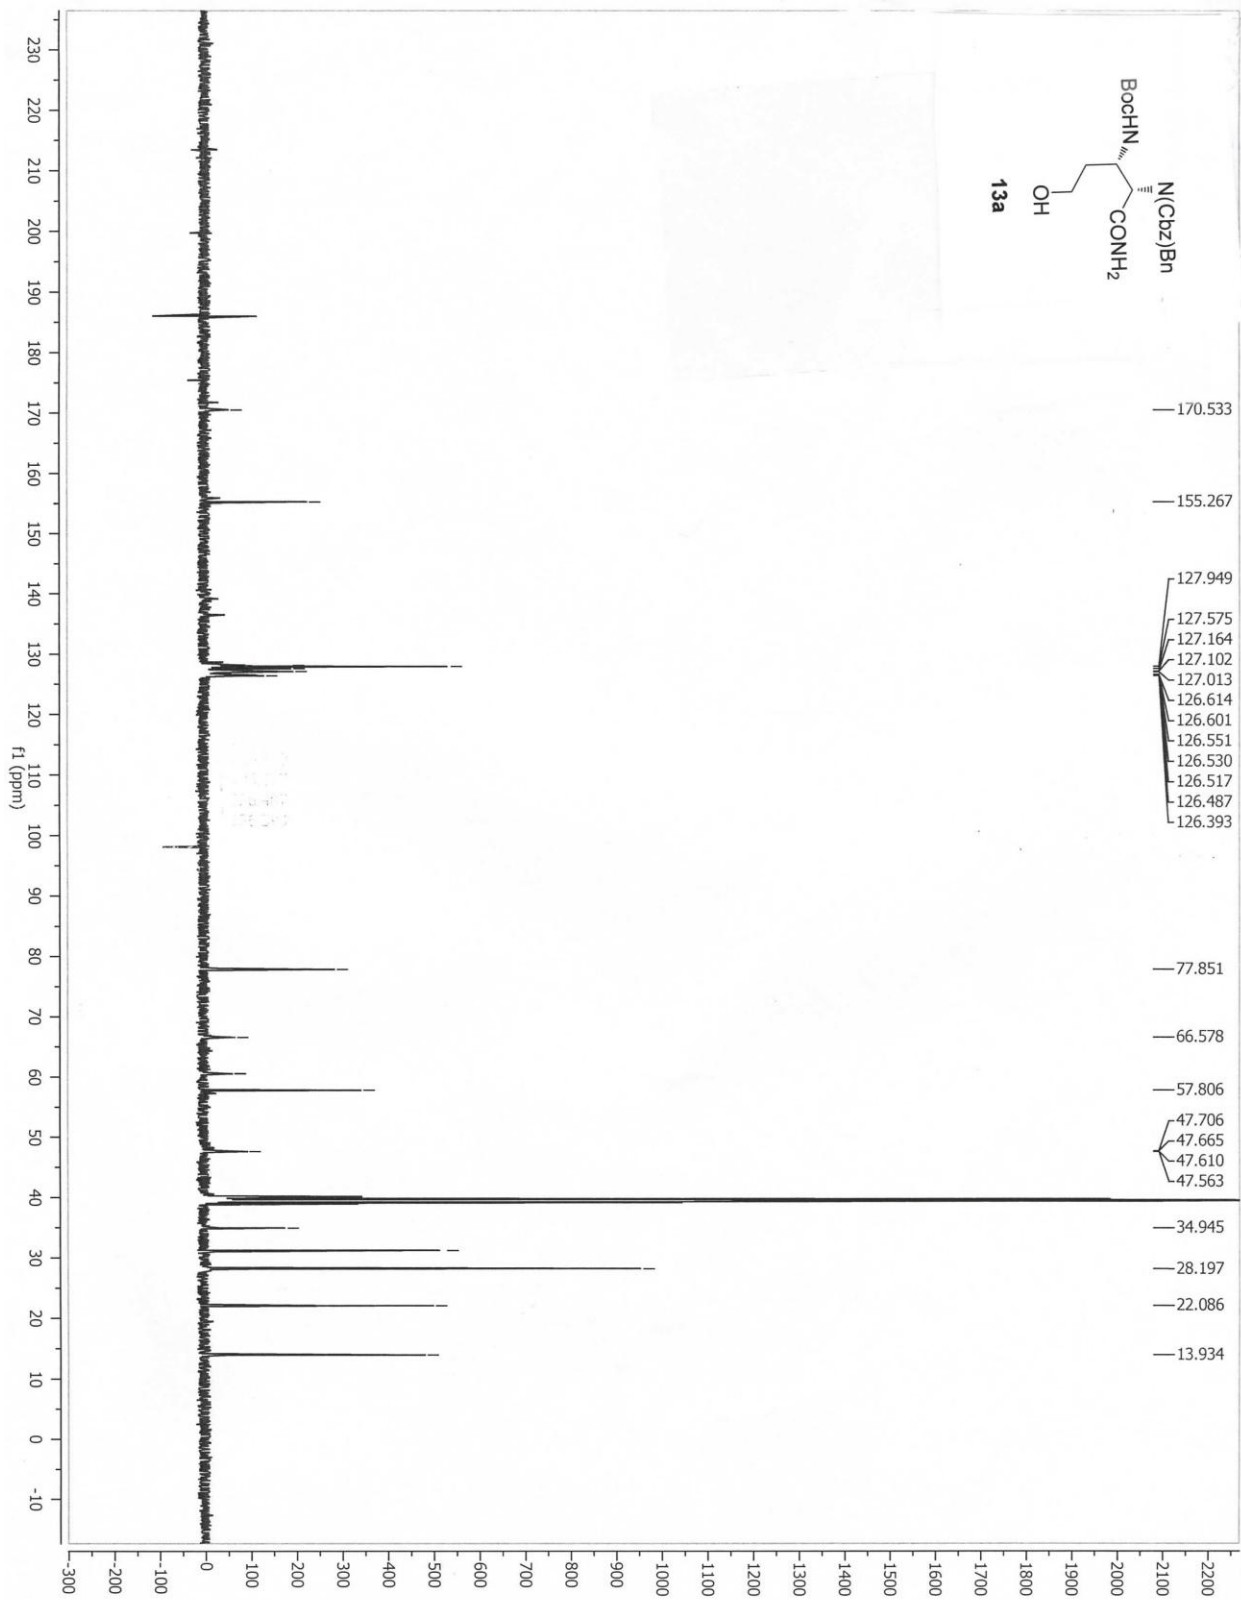

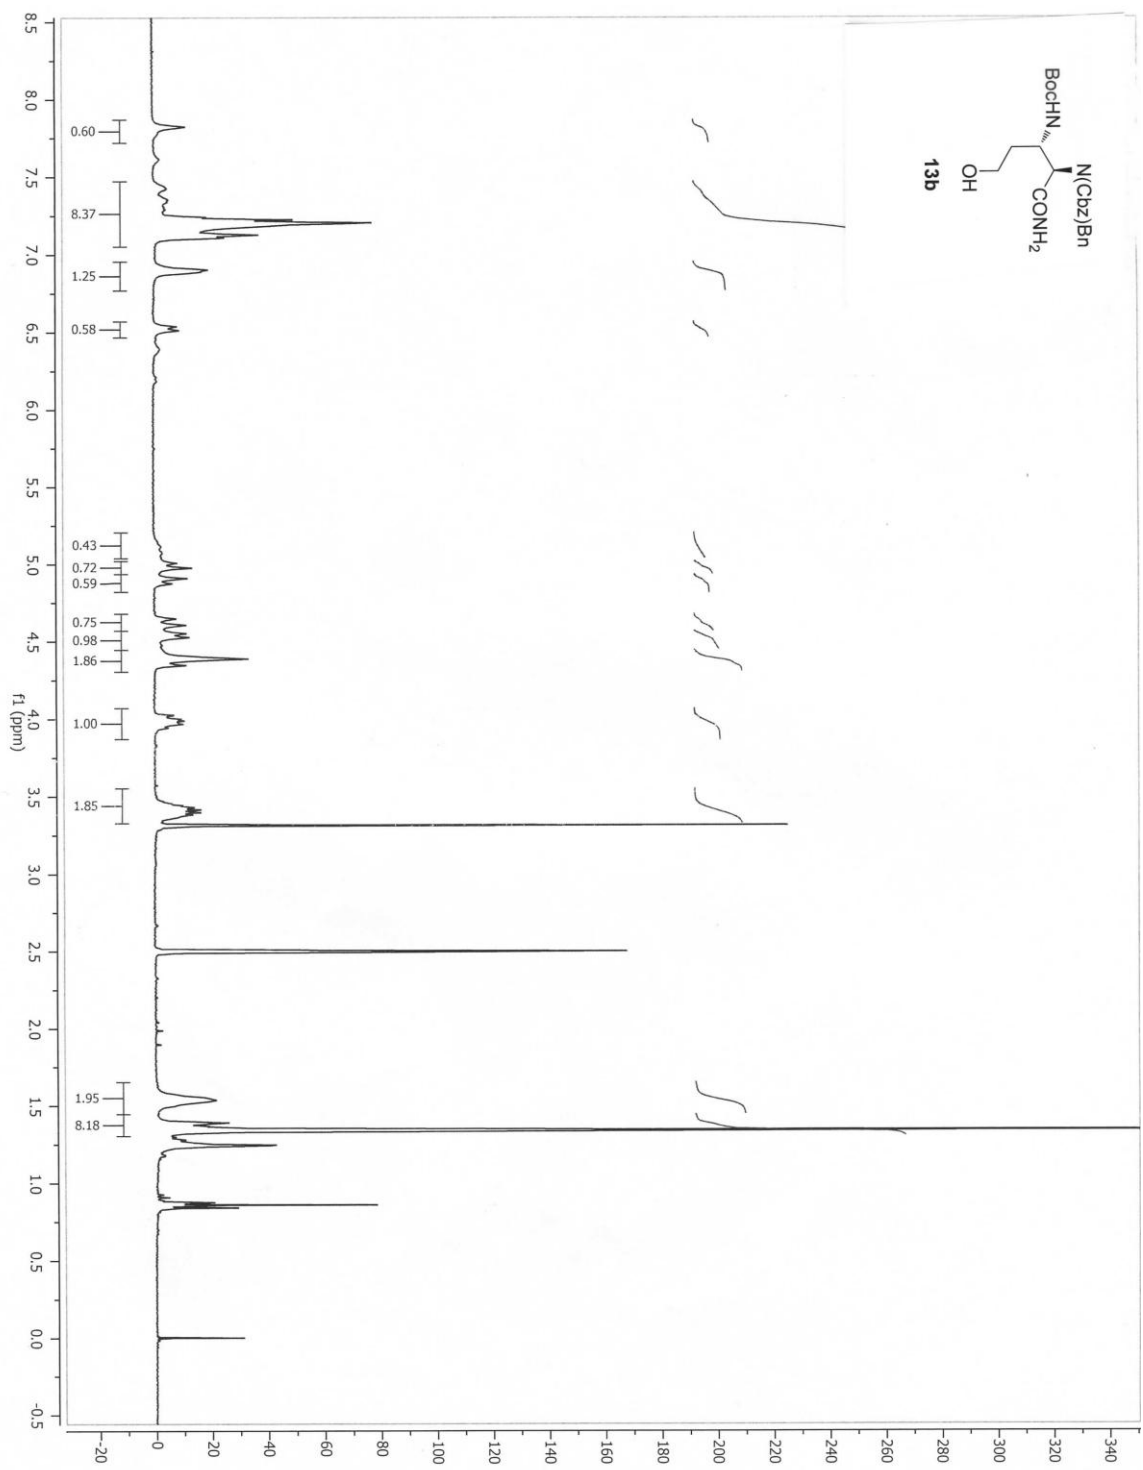



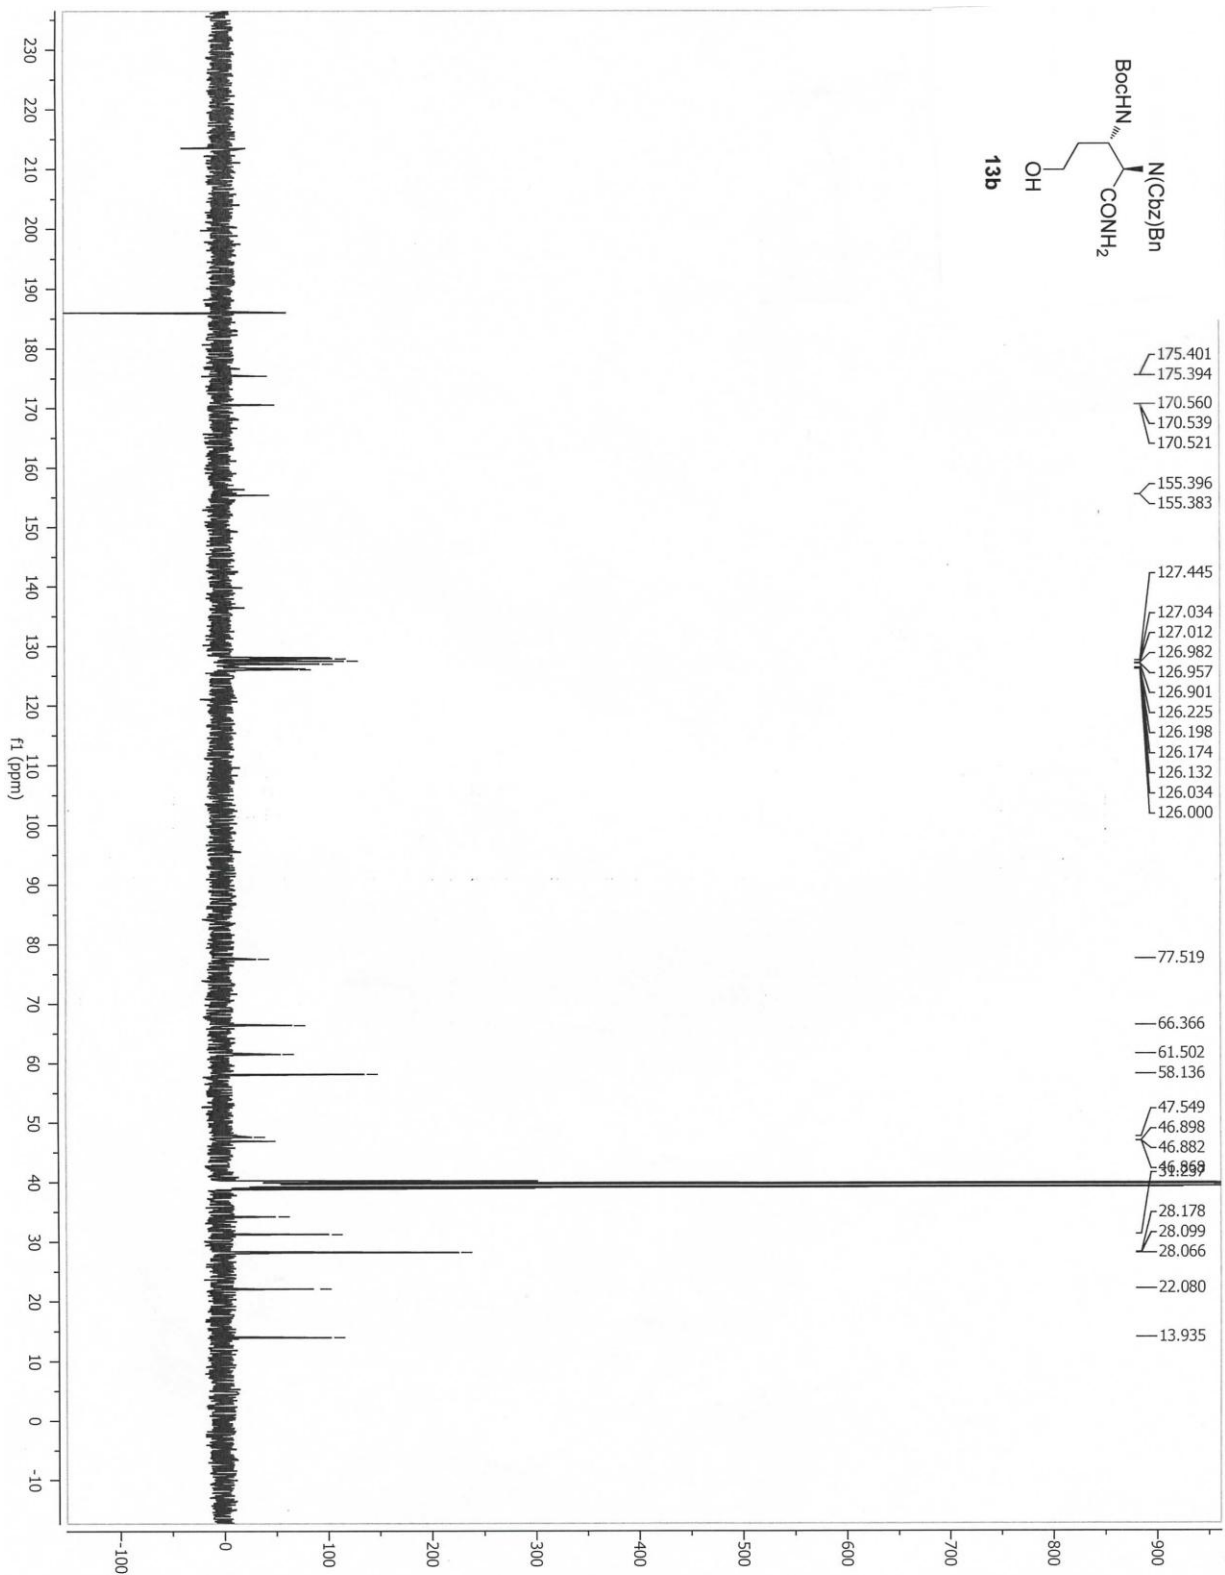

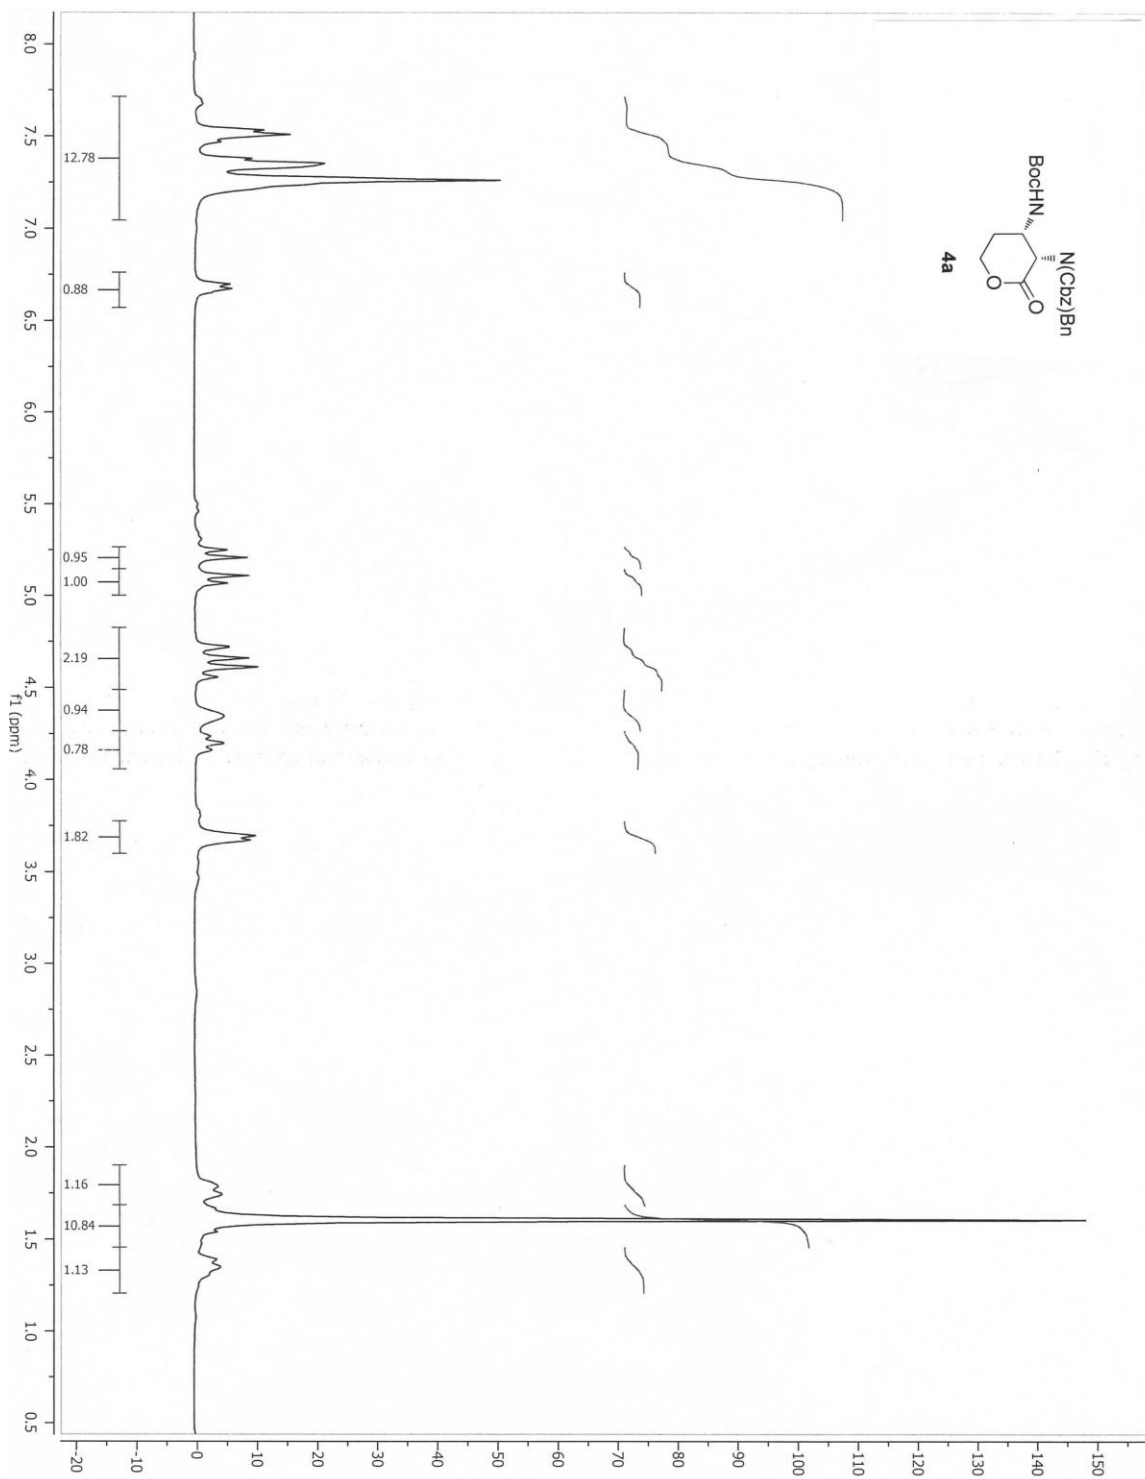

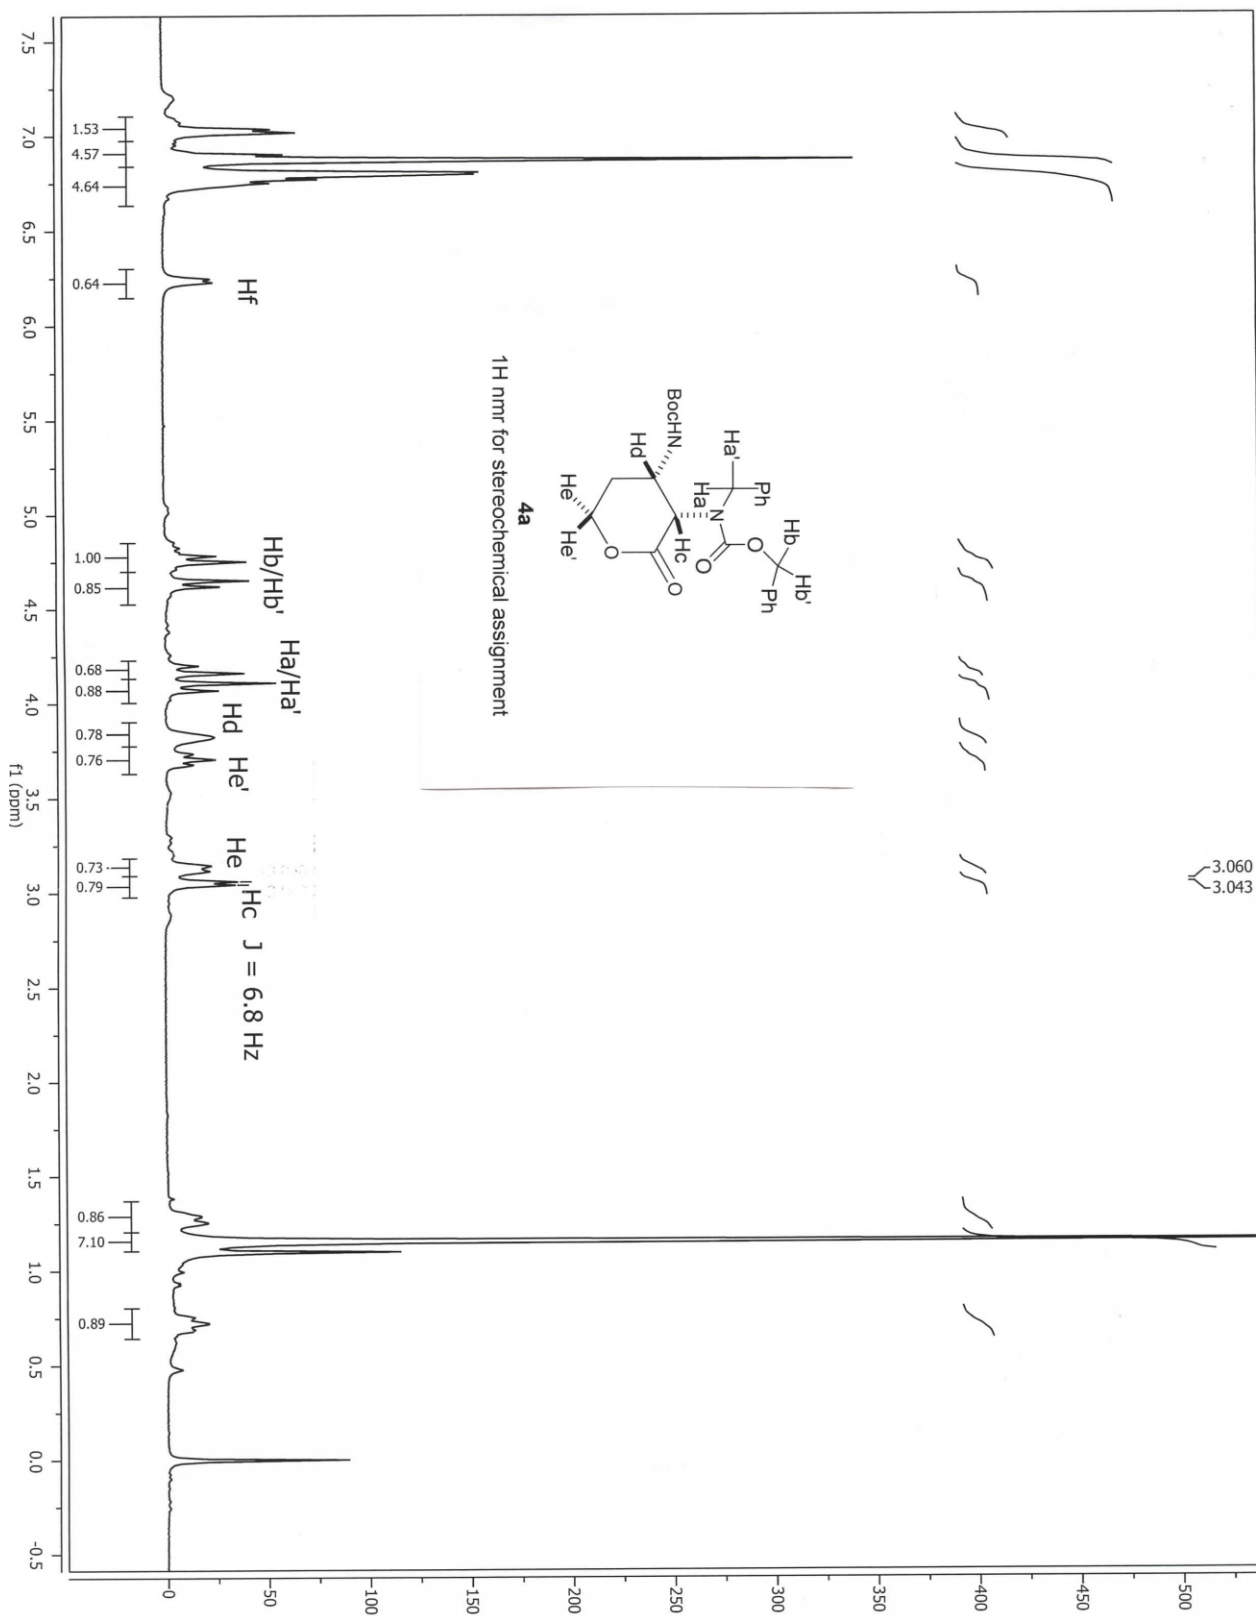

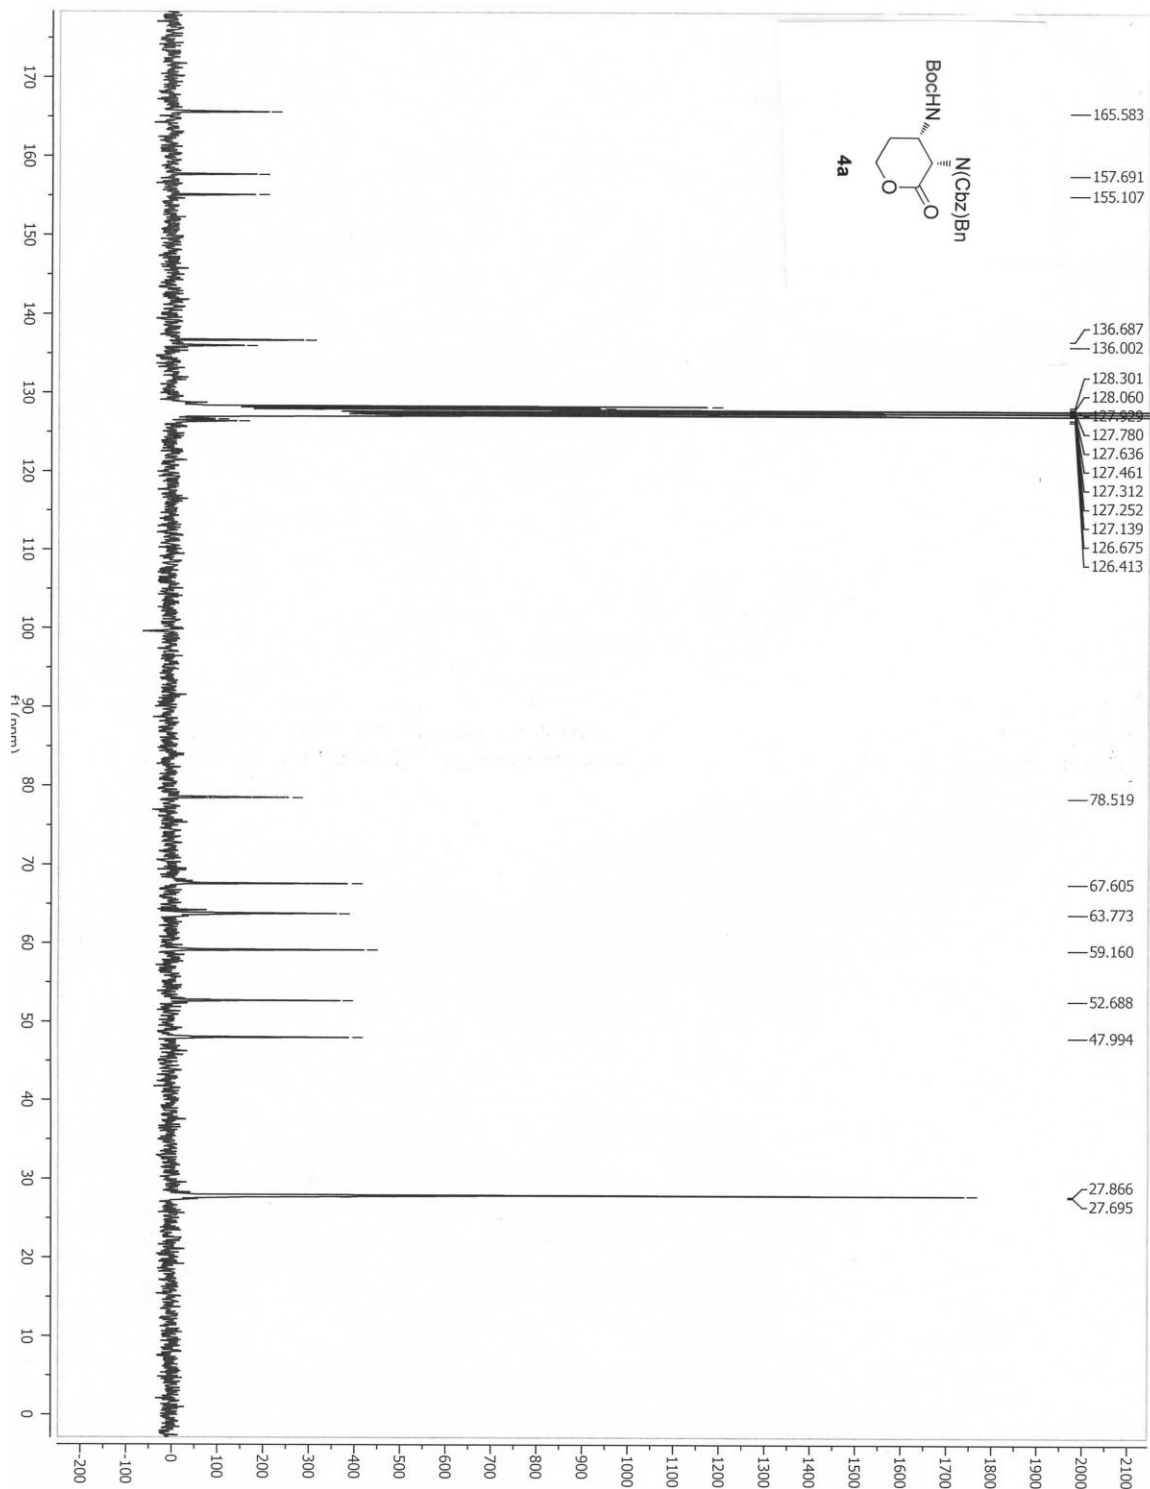

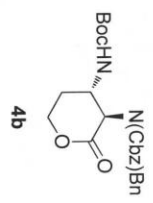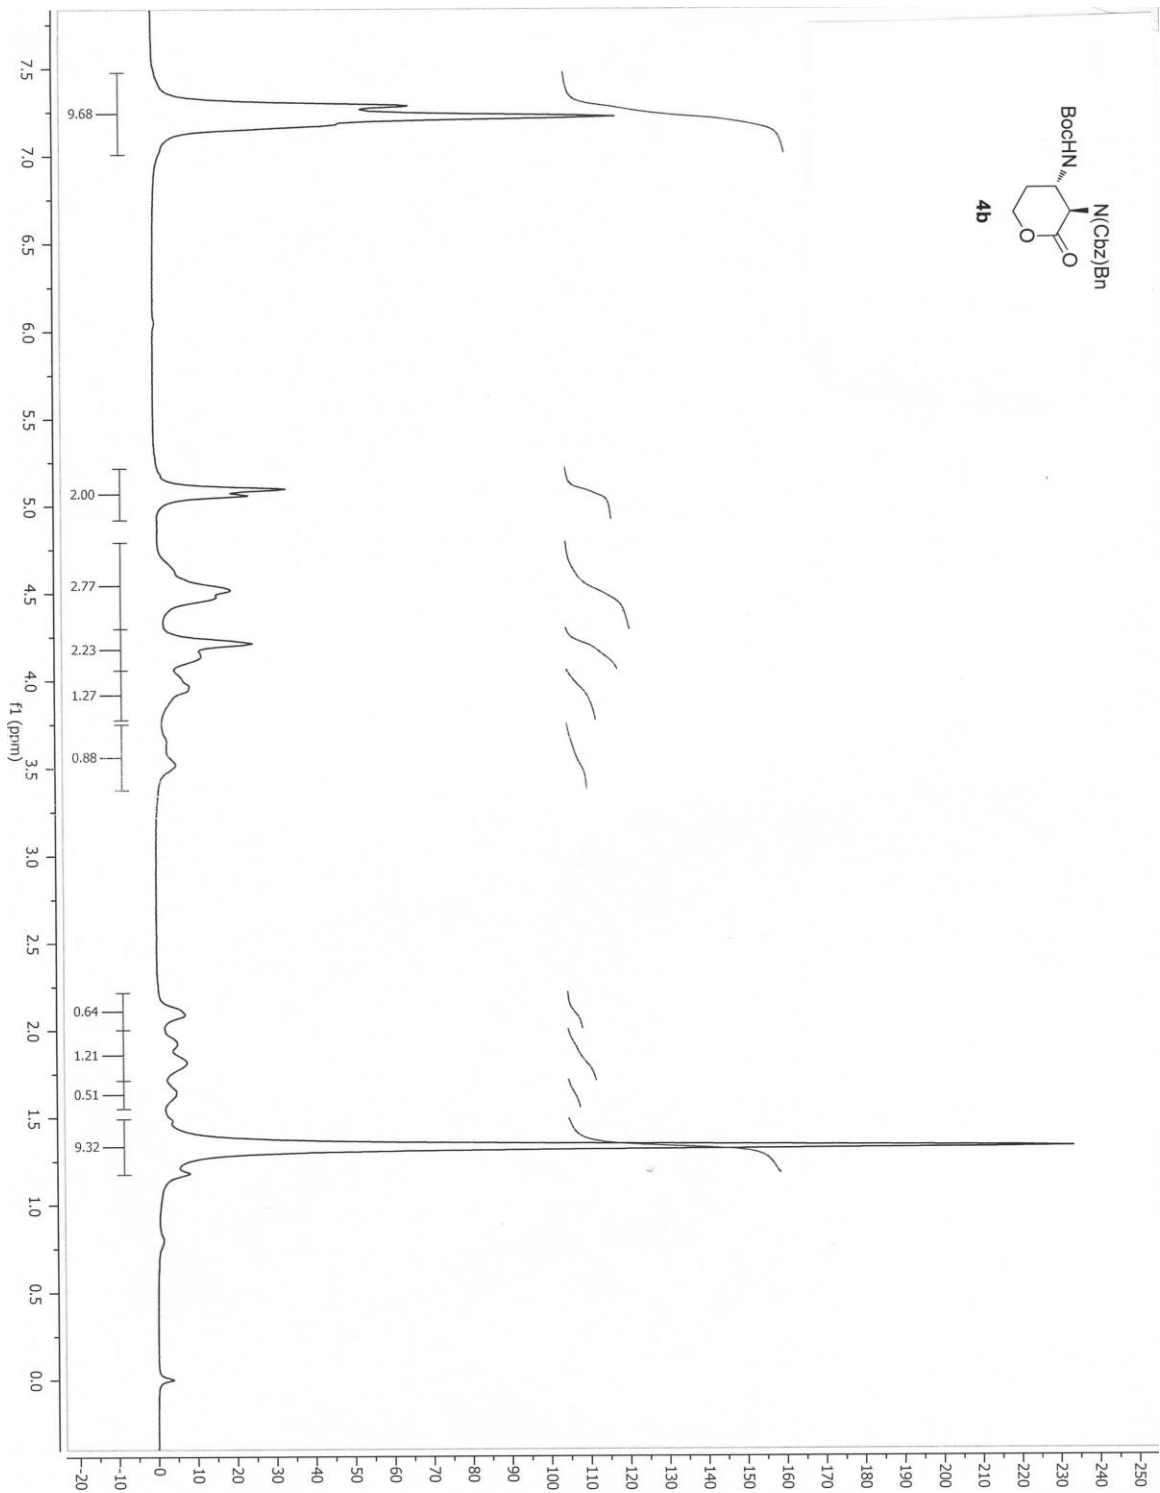

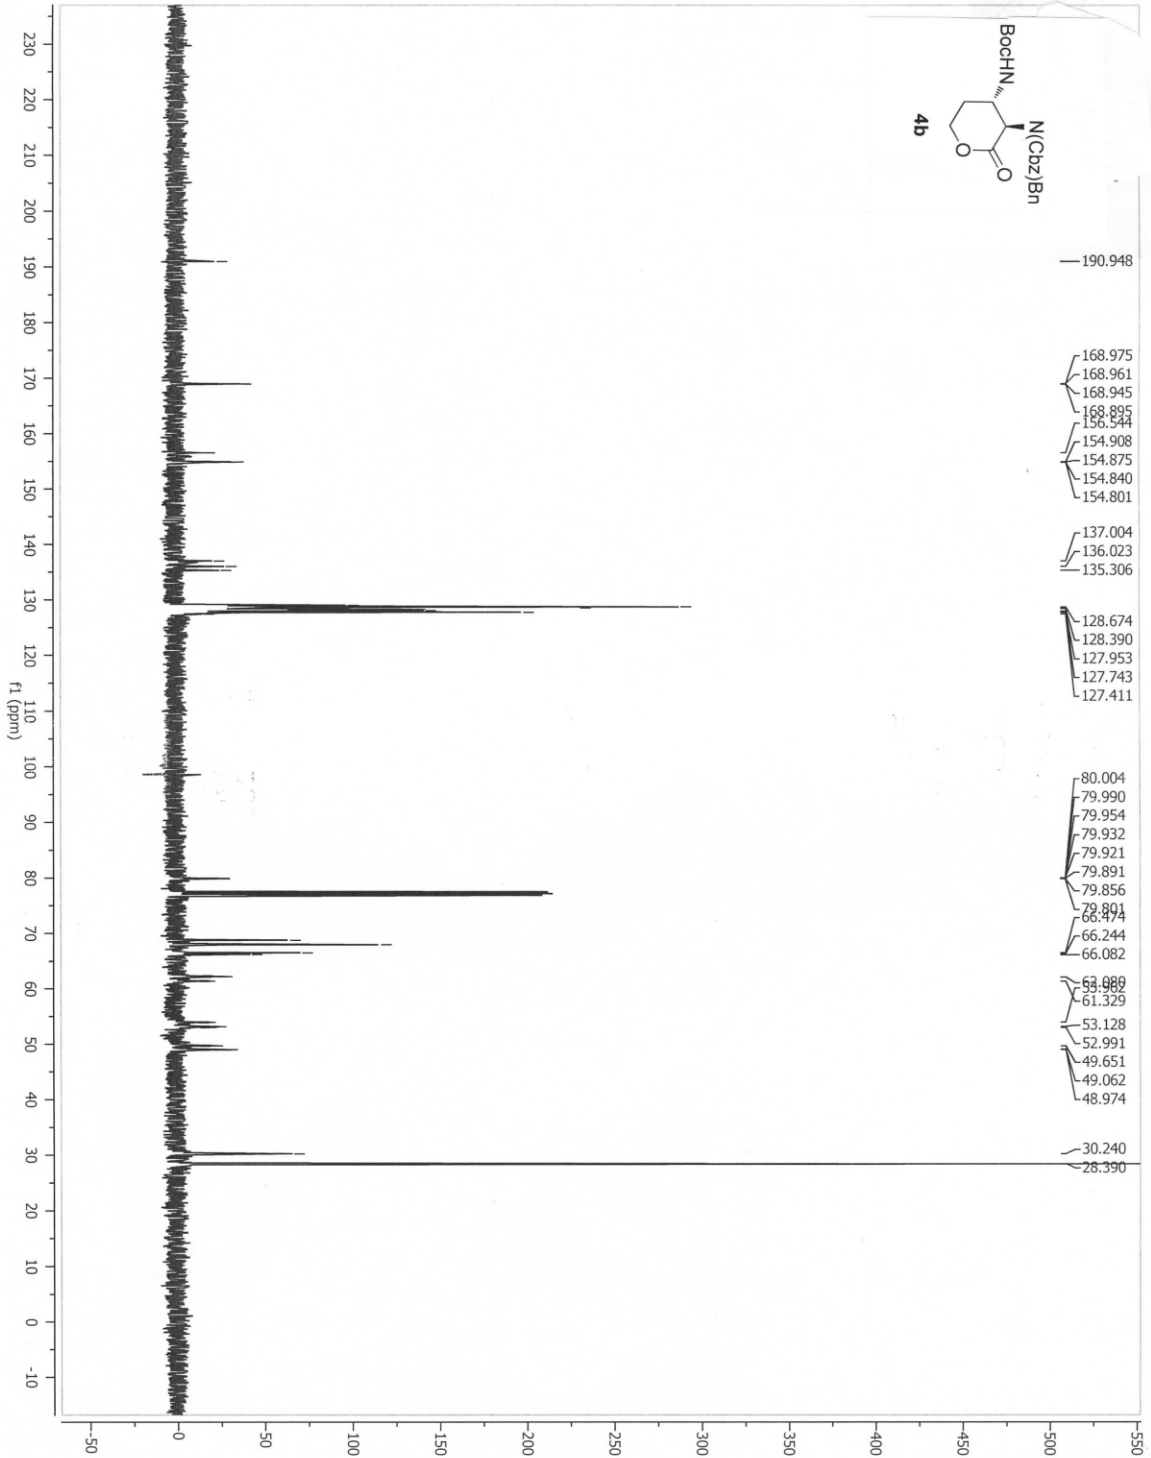

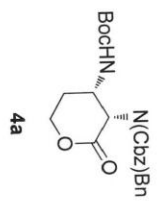

**lactone COSY**

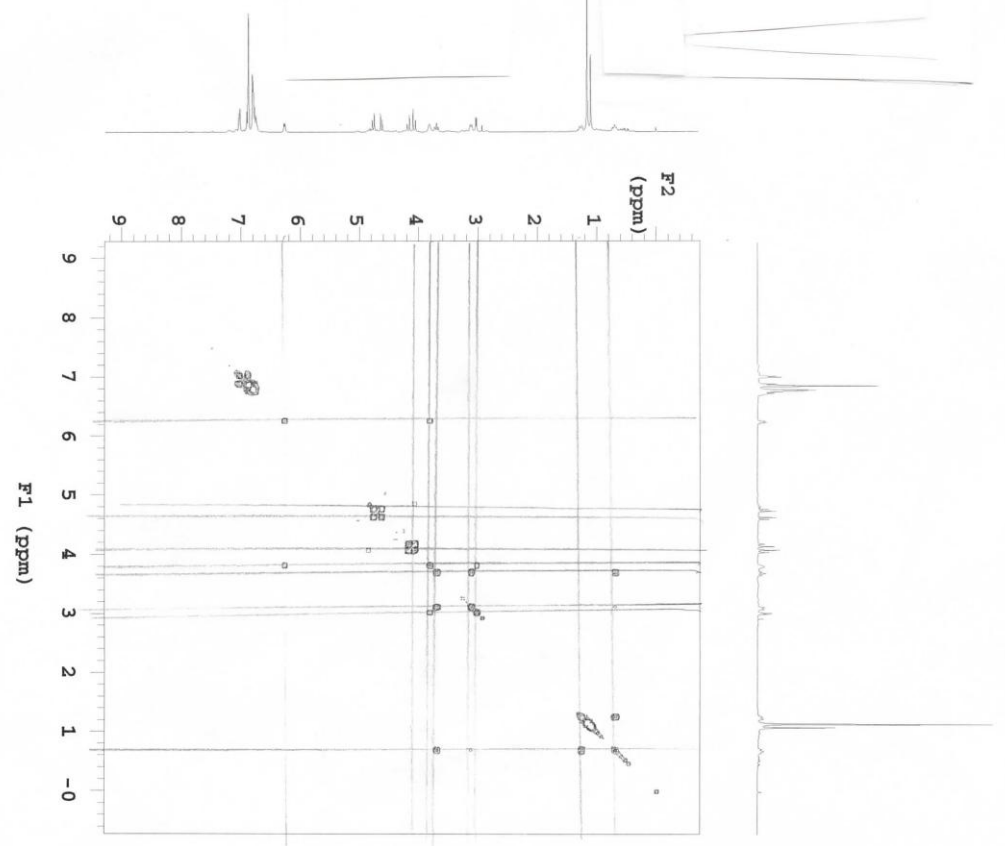

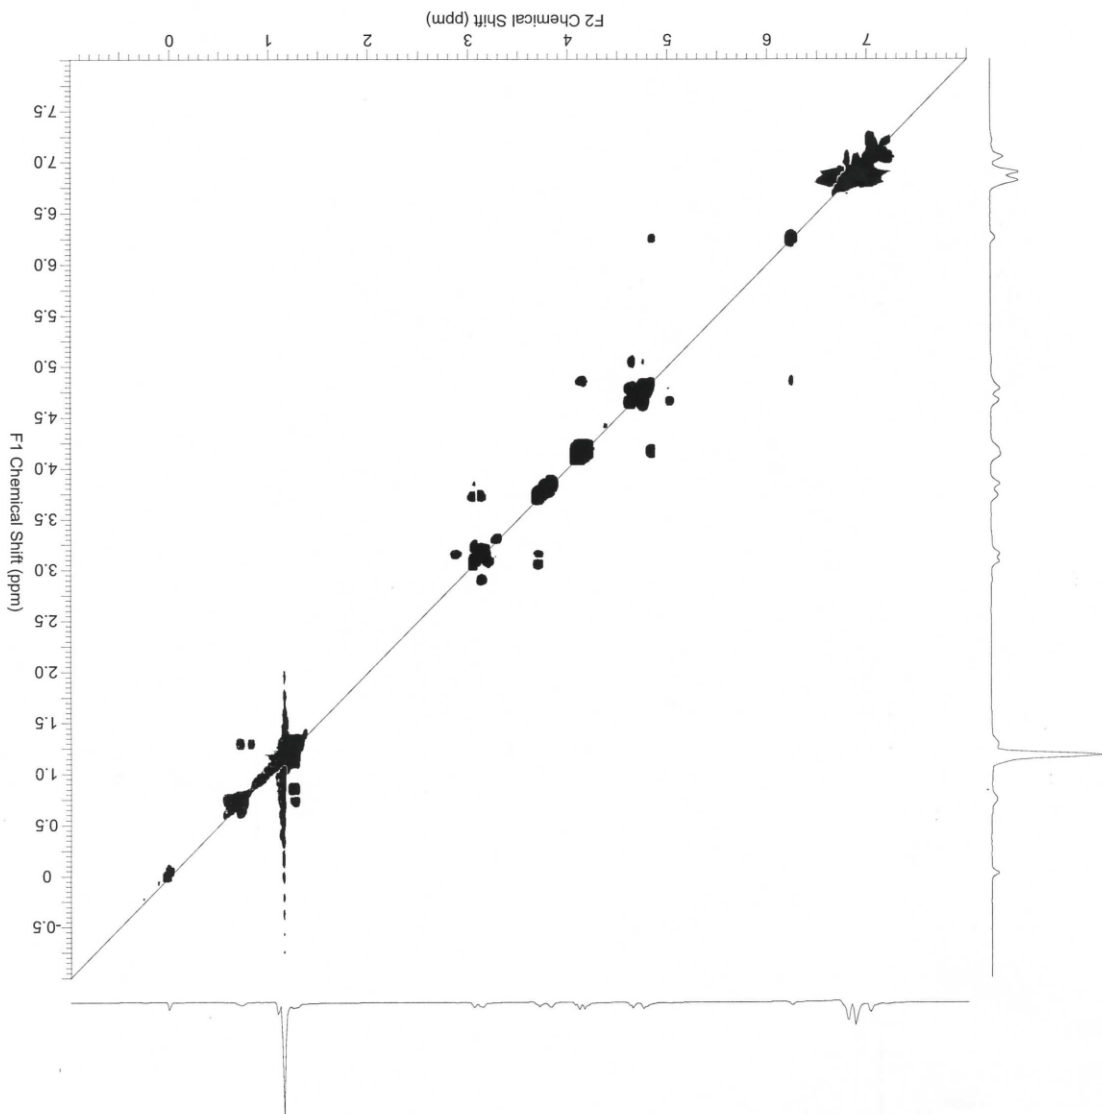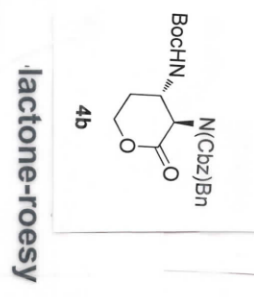



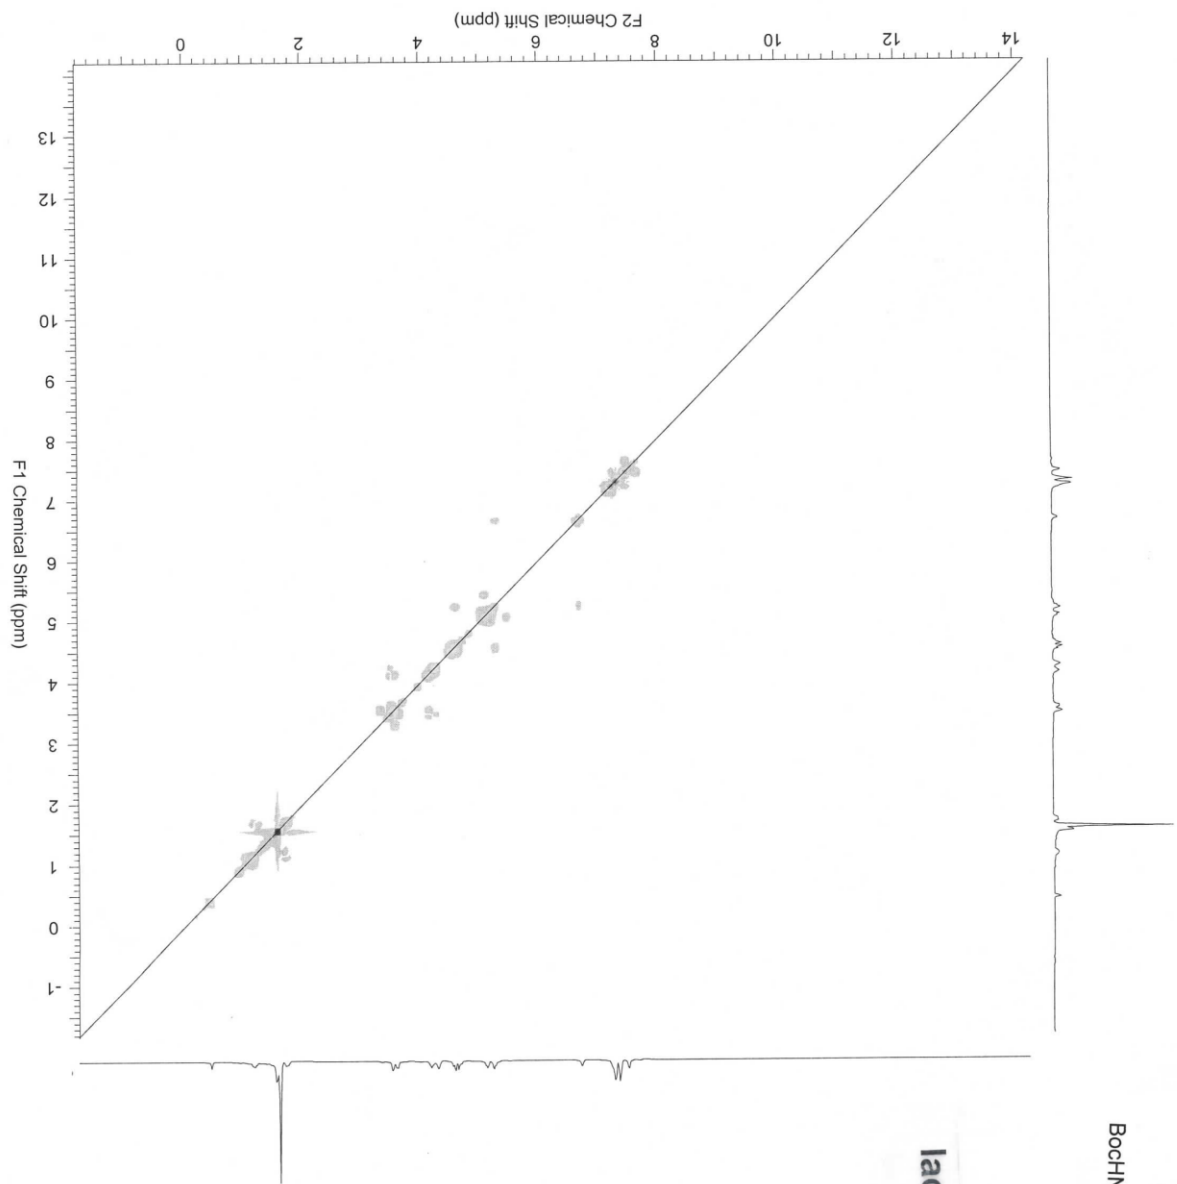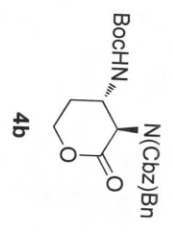

**lactone-noesy**

**NOESY map for Compound 4b and the selected  $J$  value**

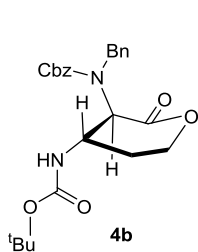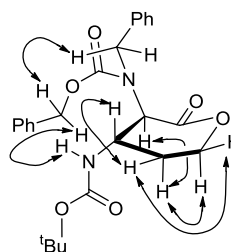

NOESY map for 4b

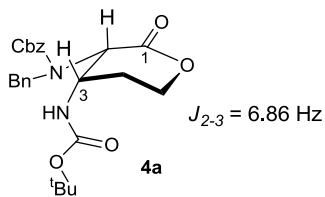

The lowest energy conformers determined by MM2 calculations and predicted coupling constant between the C2- and C3-protons

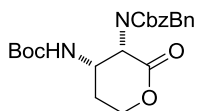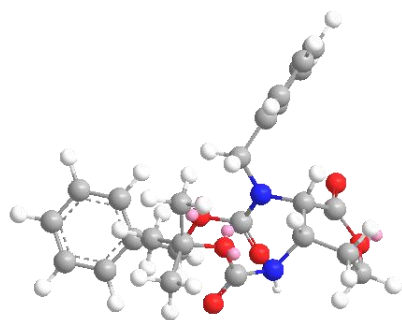

18.09 Kcal/mol

37.1°

$J = \sim 6\text{--}8$  Hz

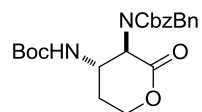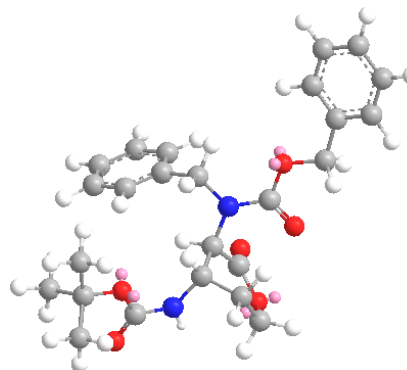

24.9551 Kcal/mol

81.3°

$J = \sim 0.05$  Hz

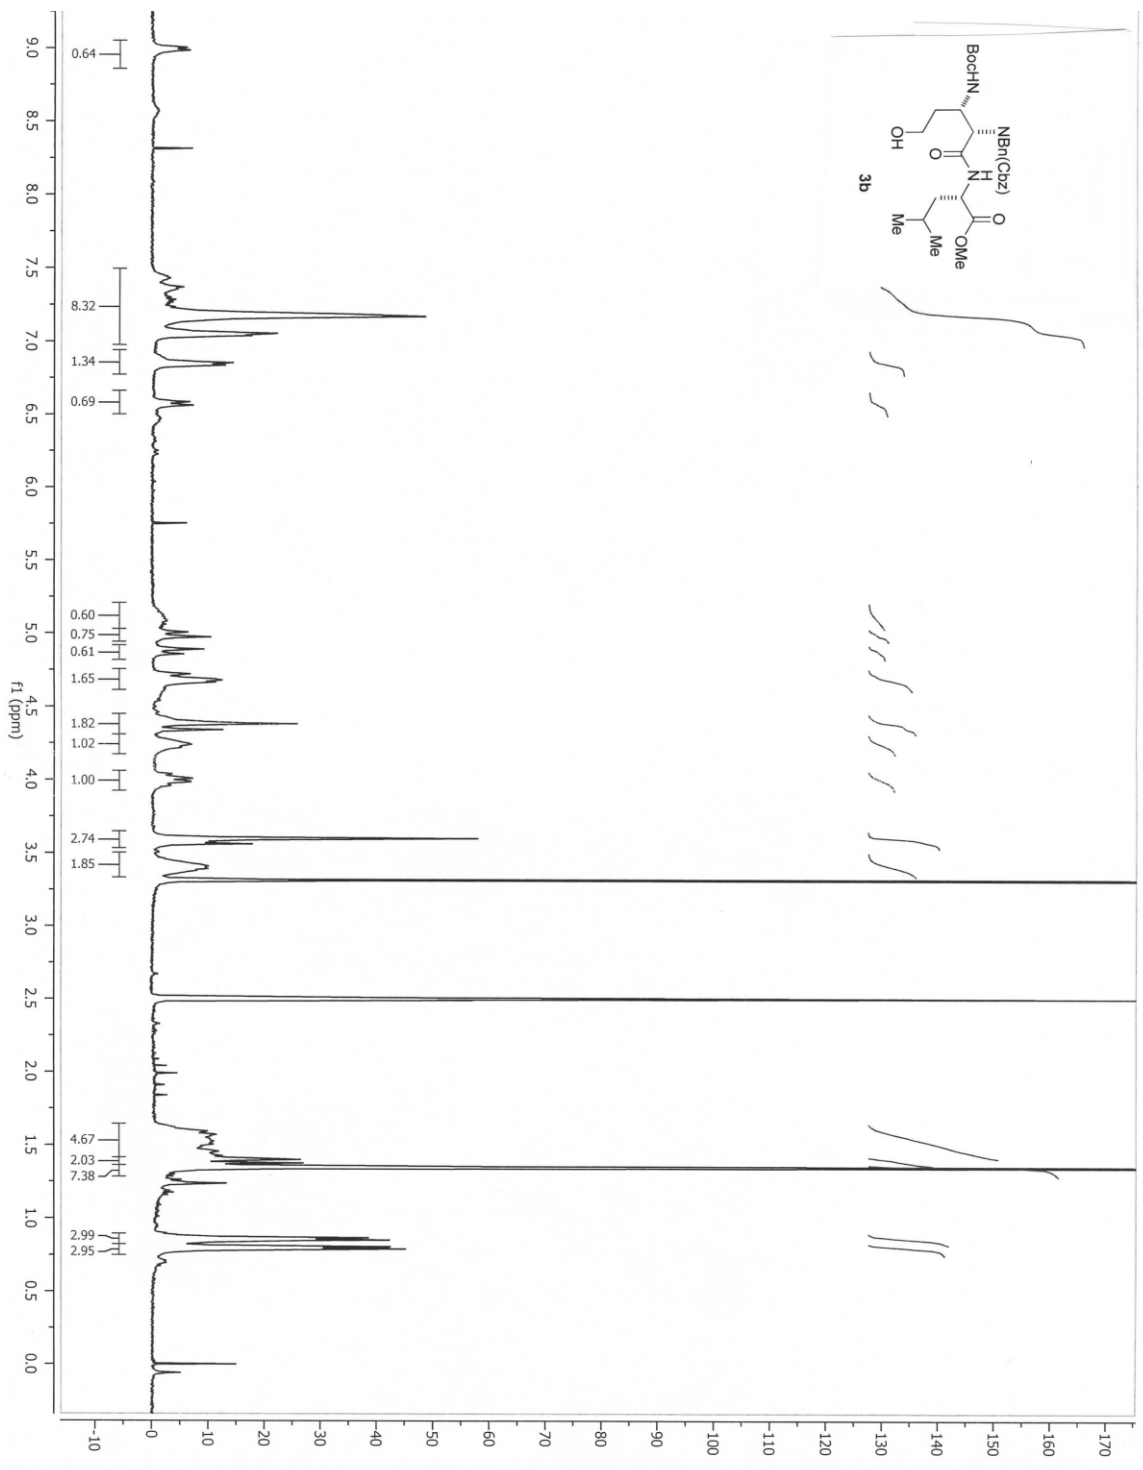

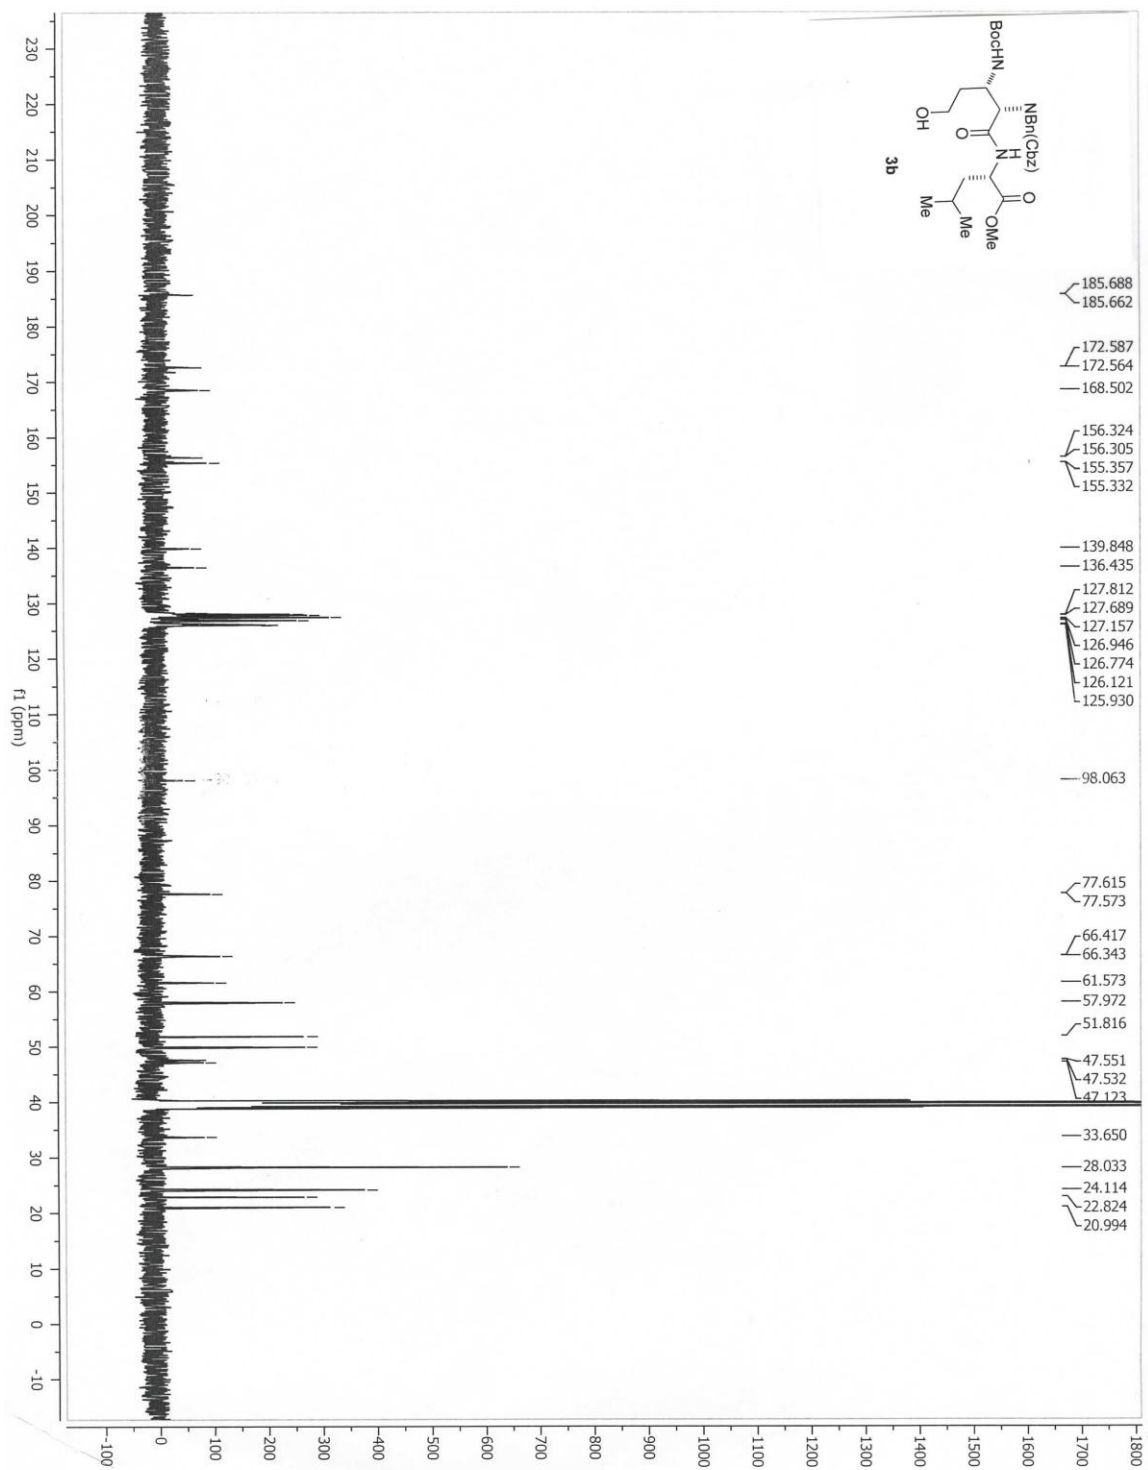



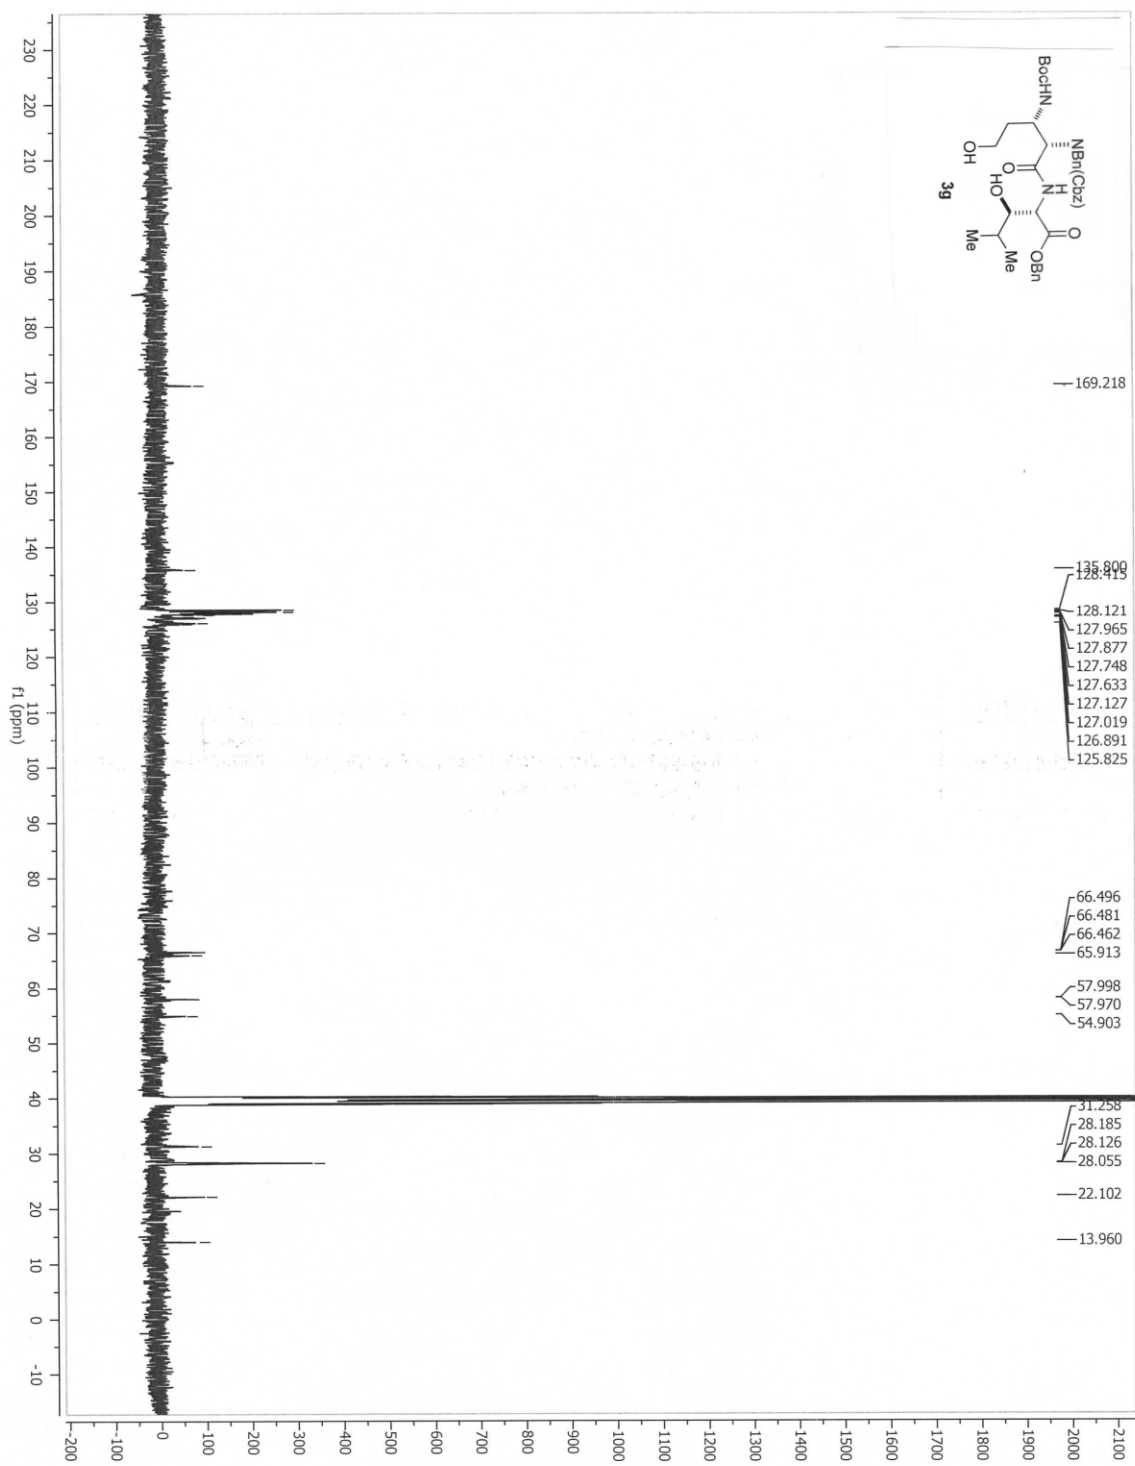

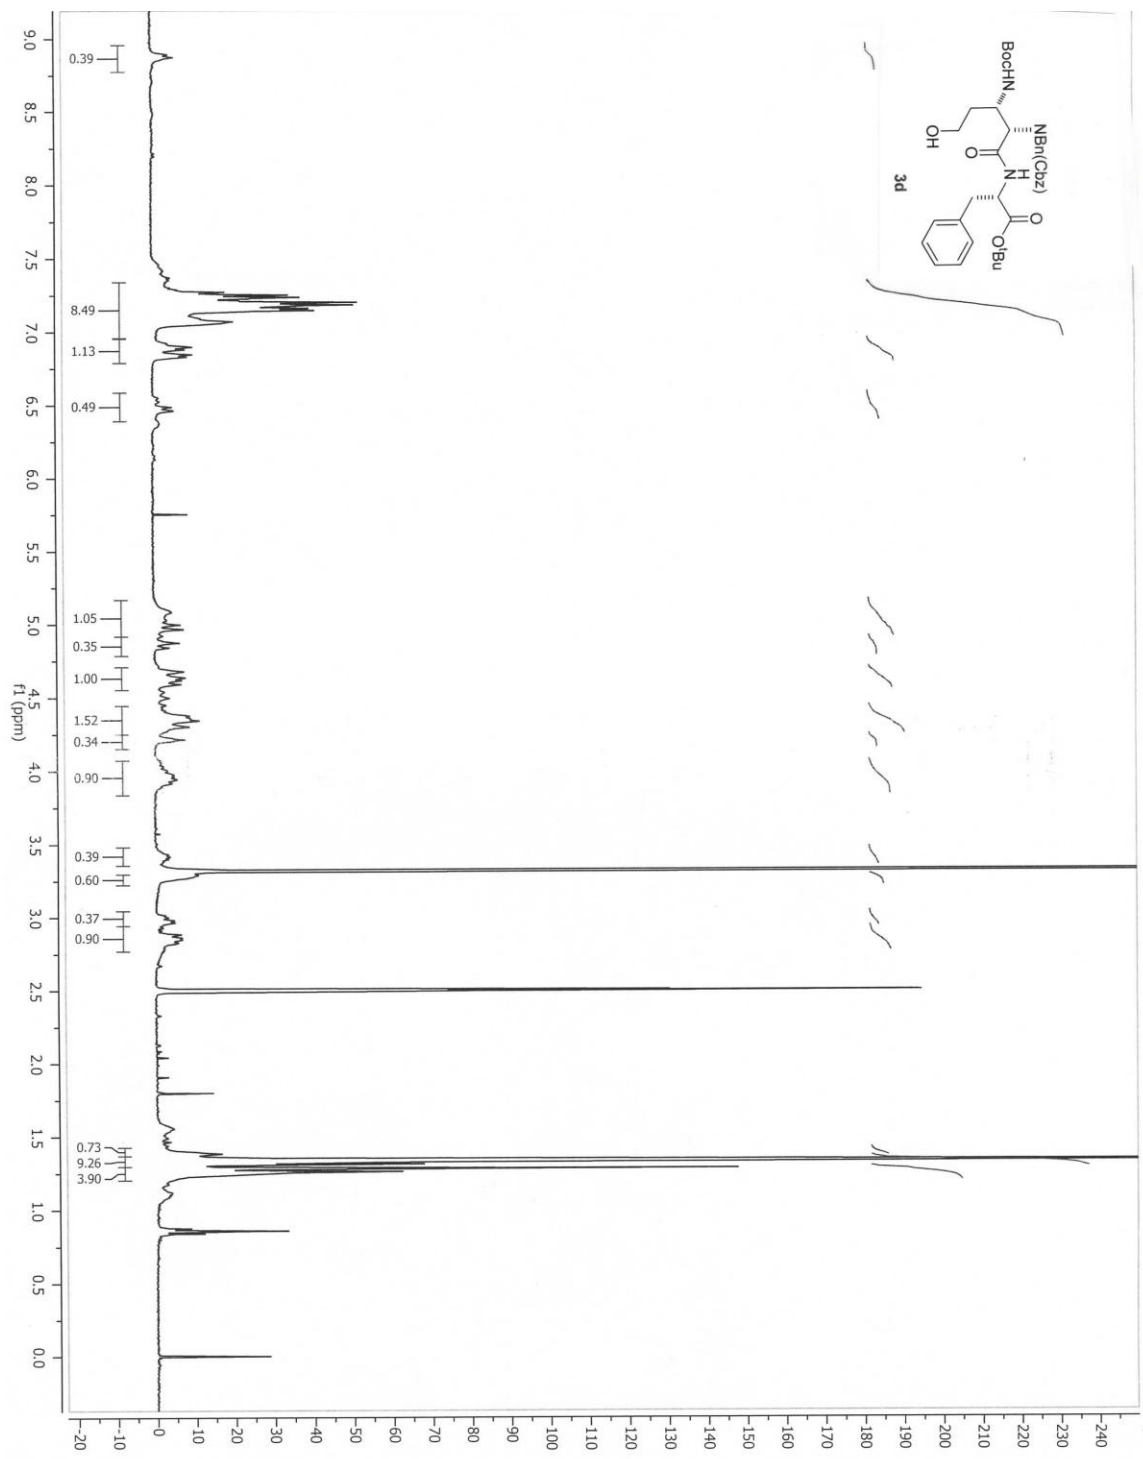

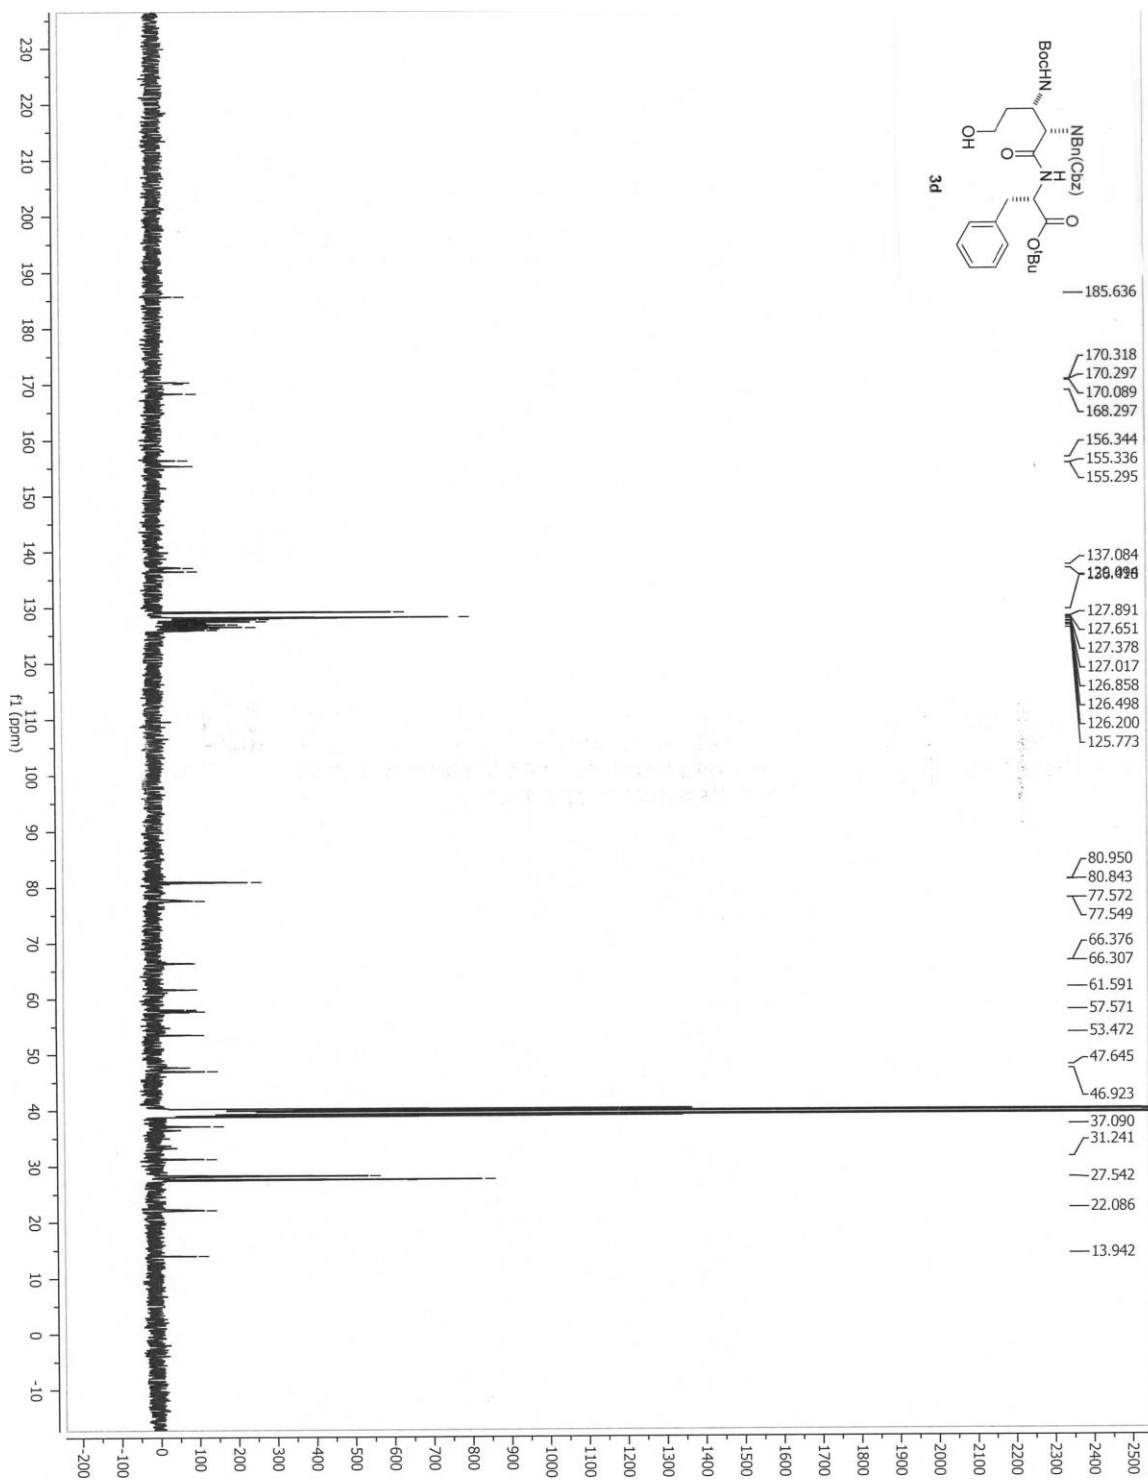



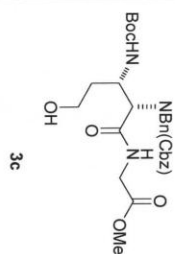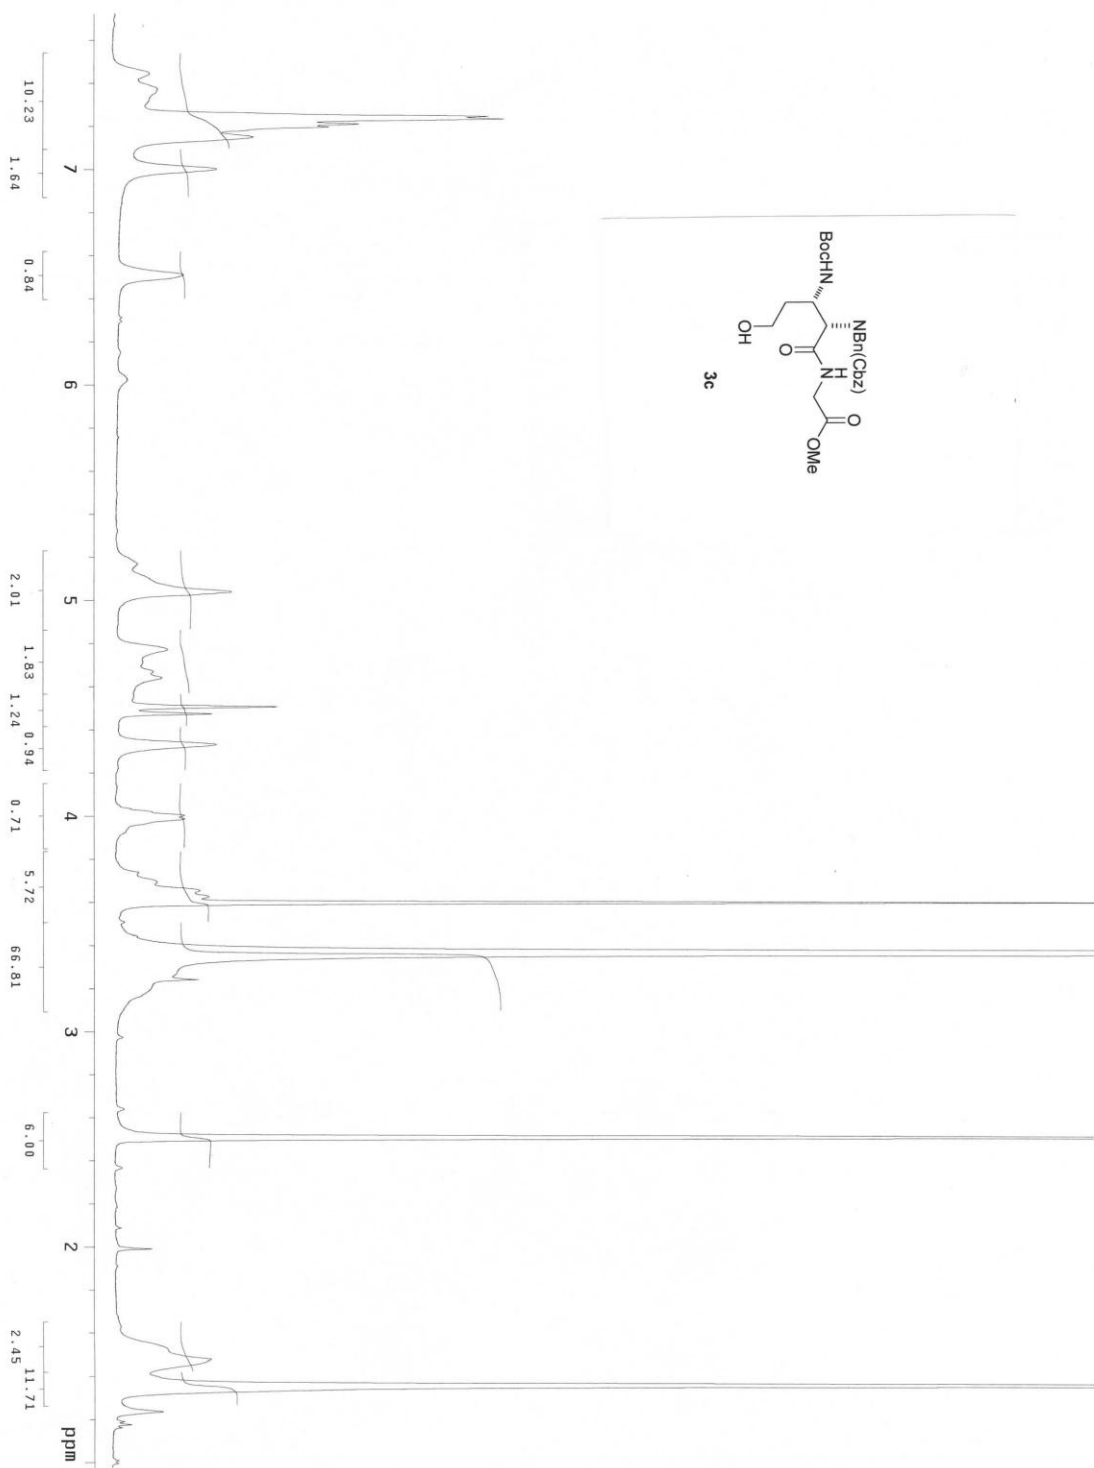



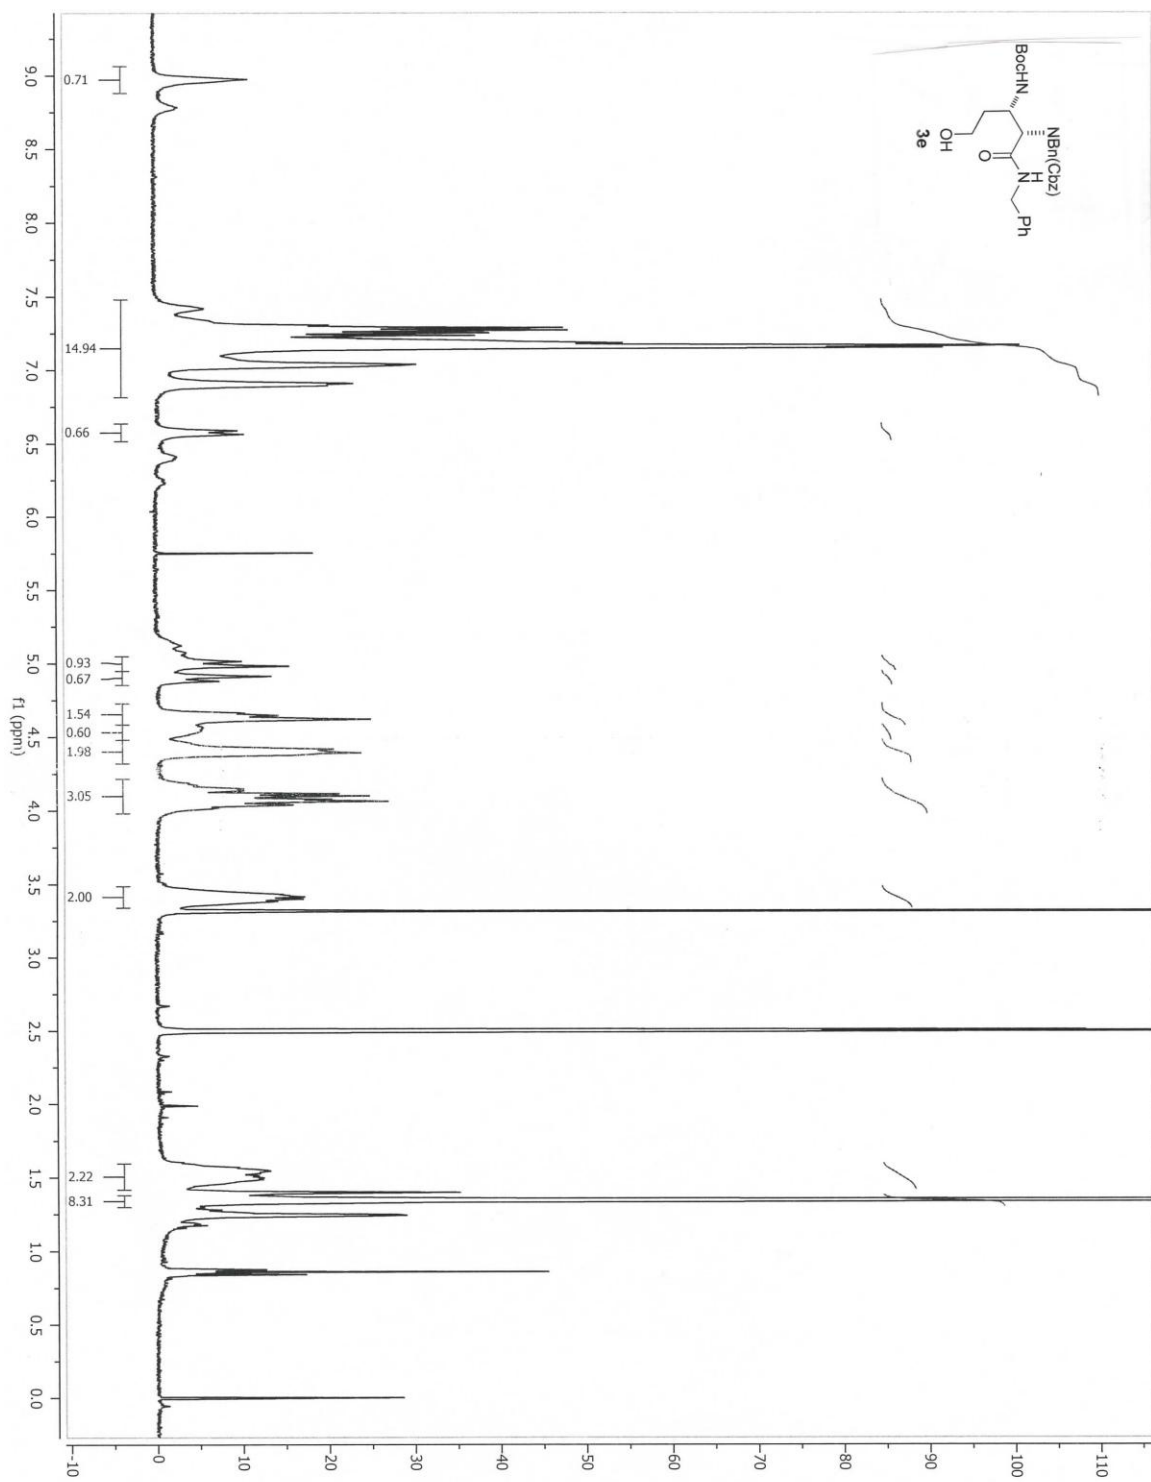

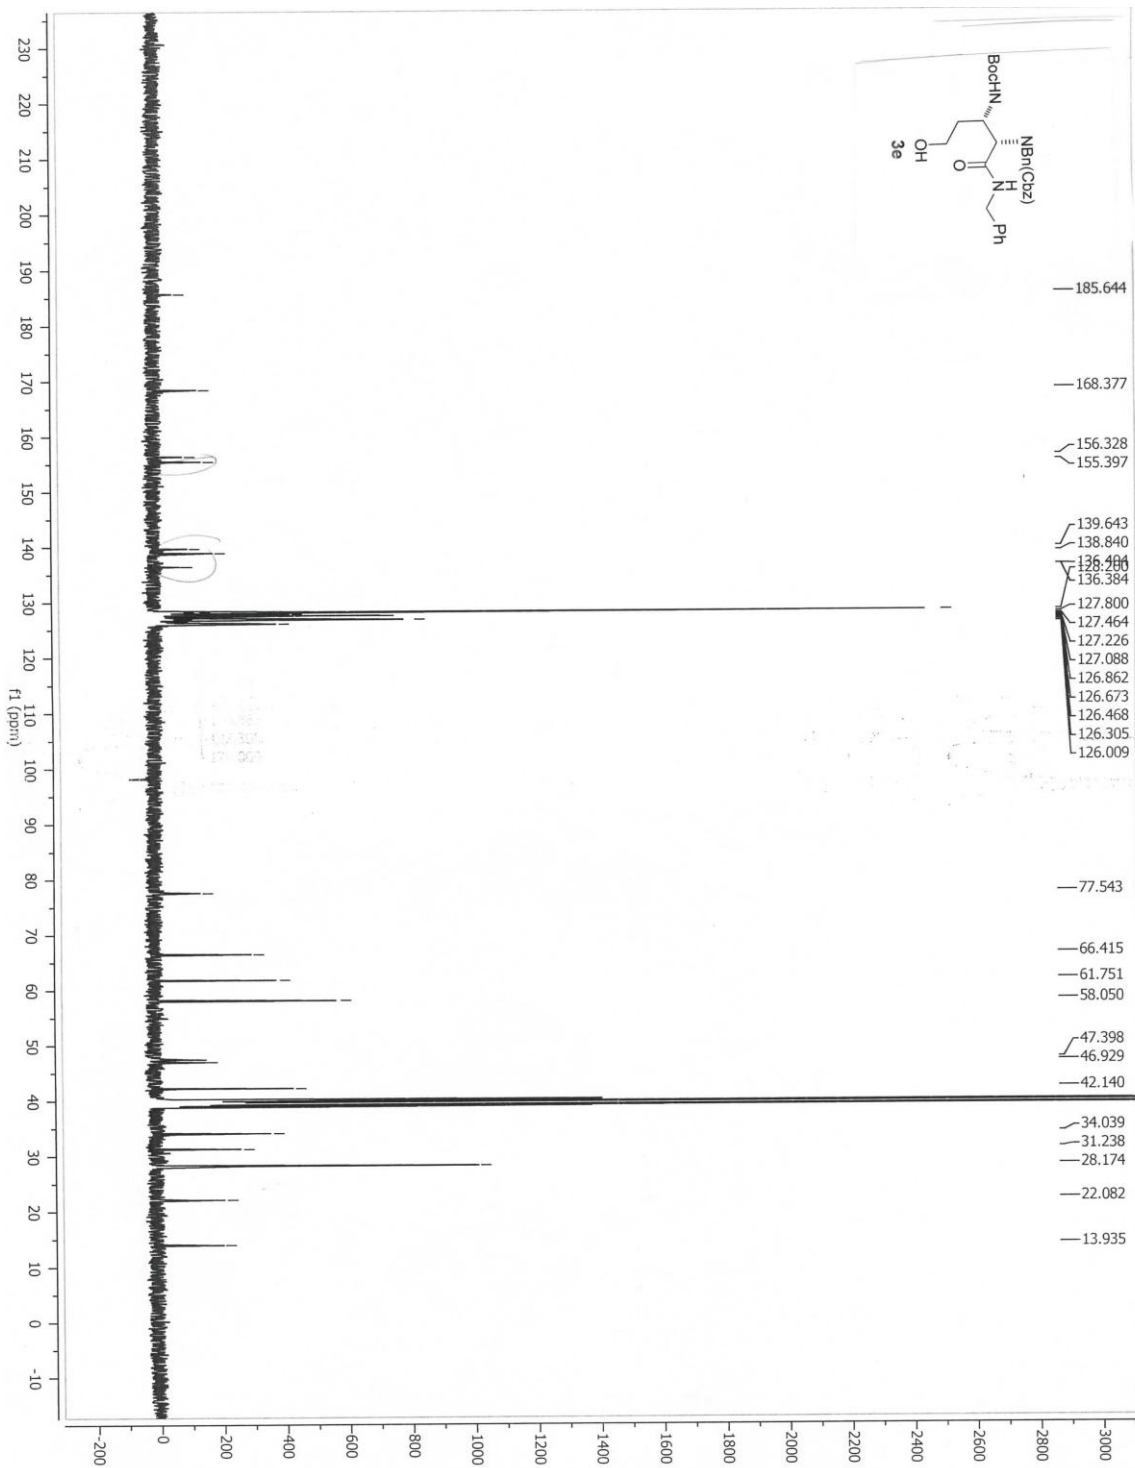

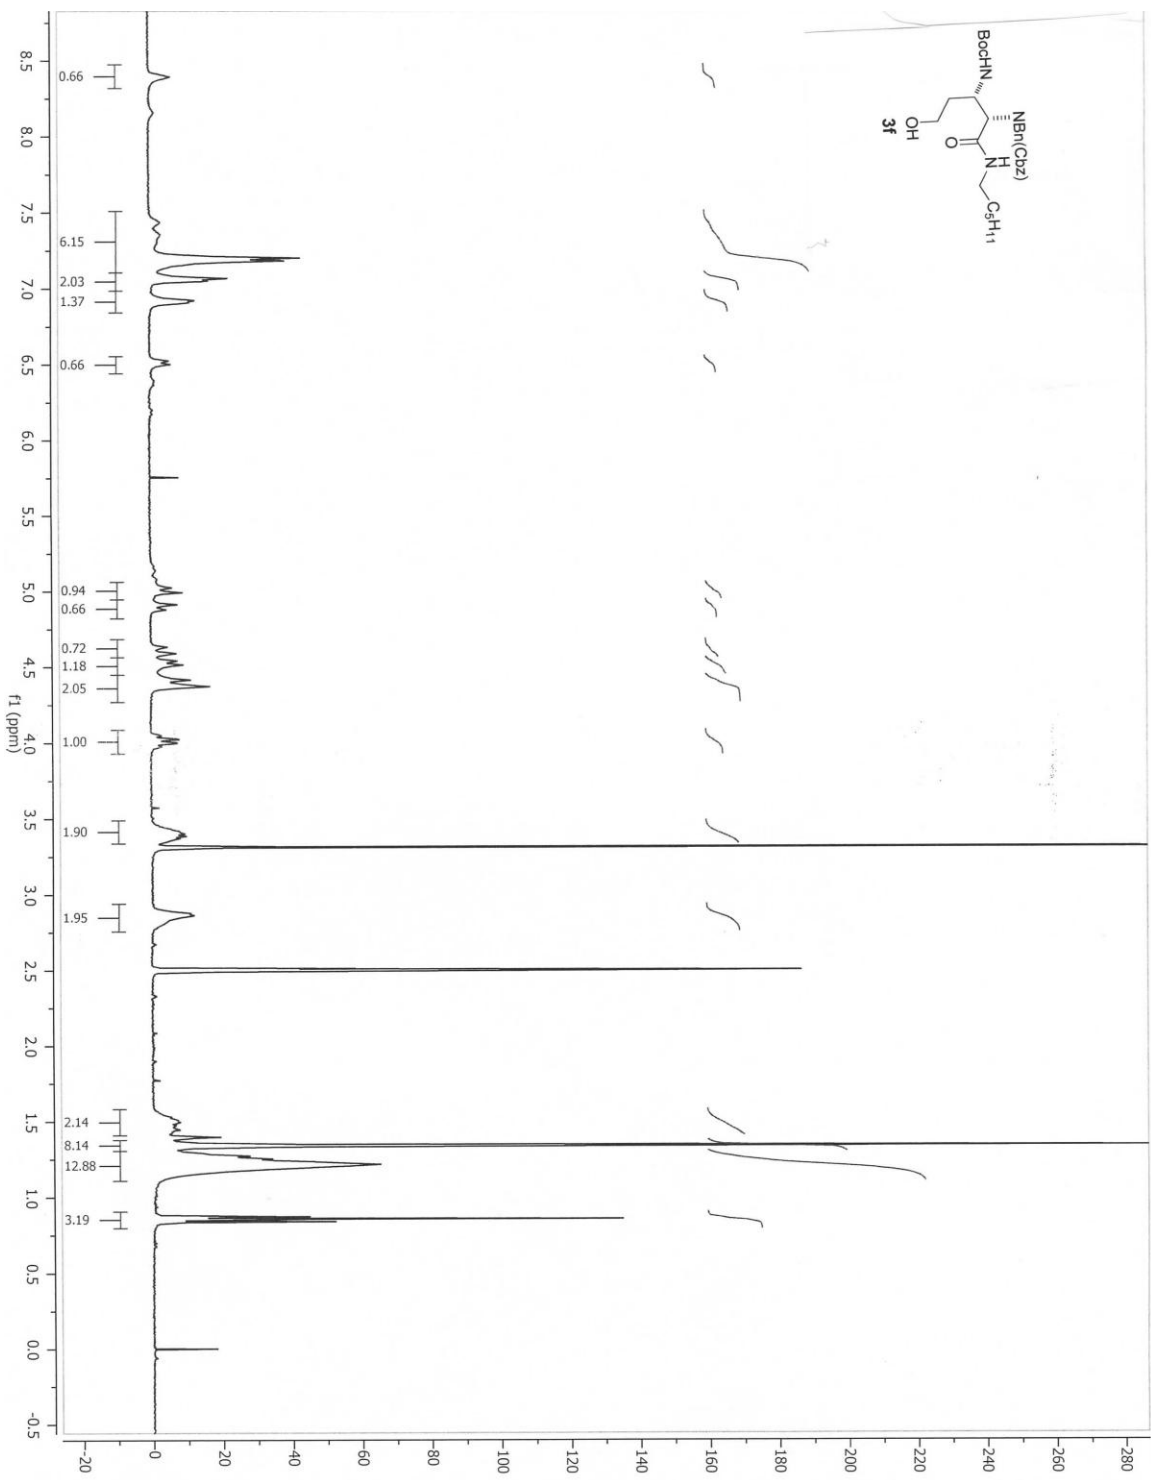

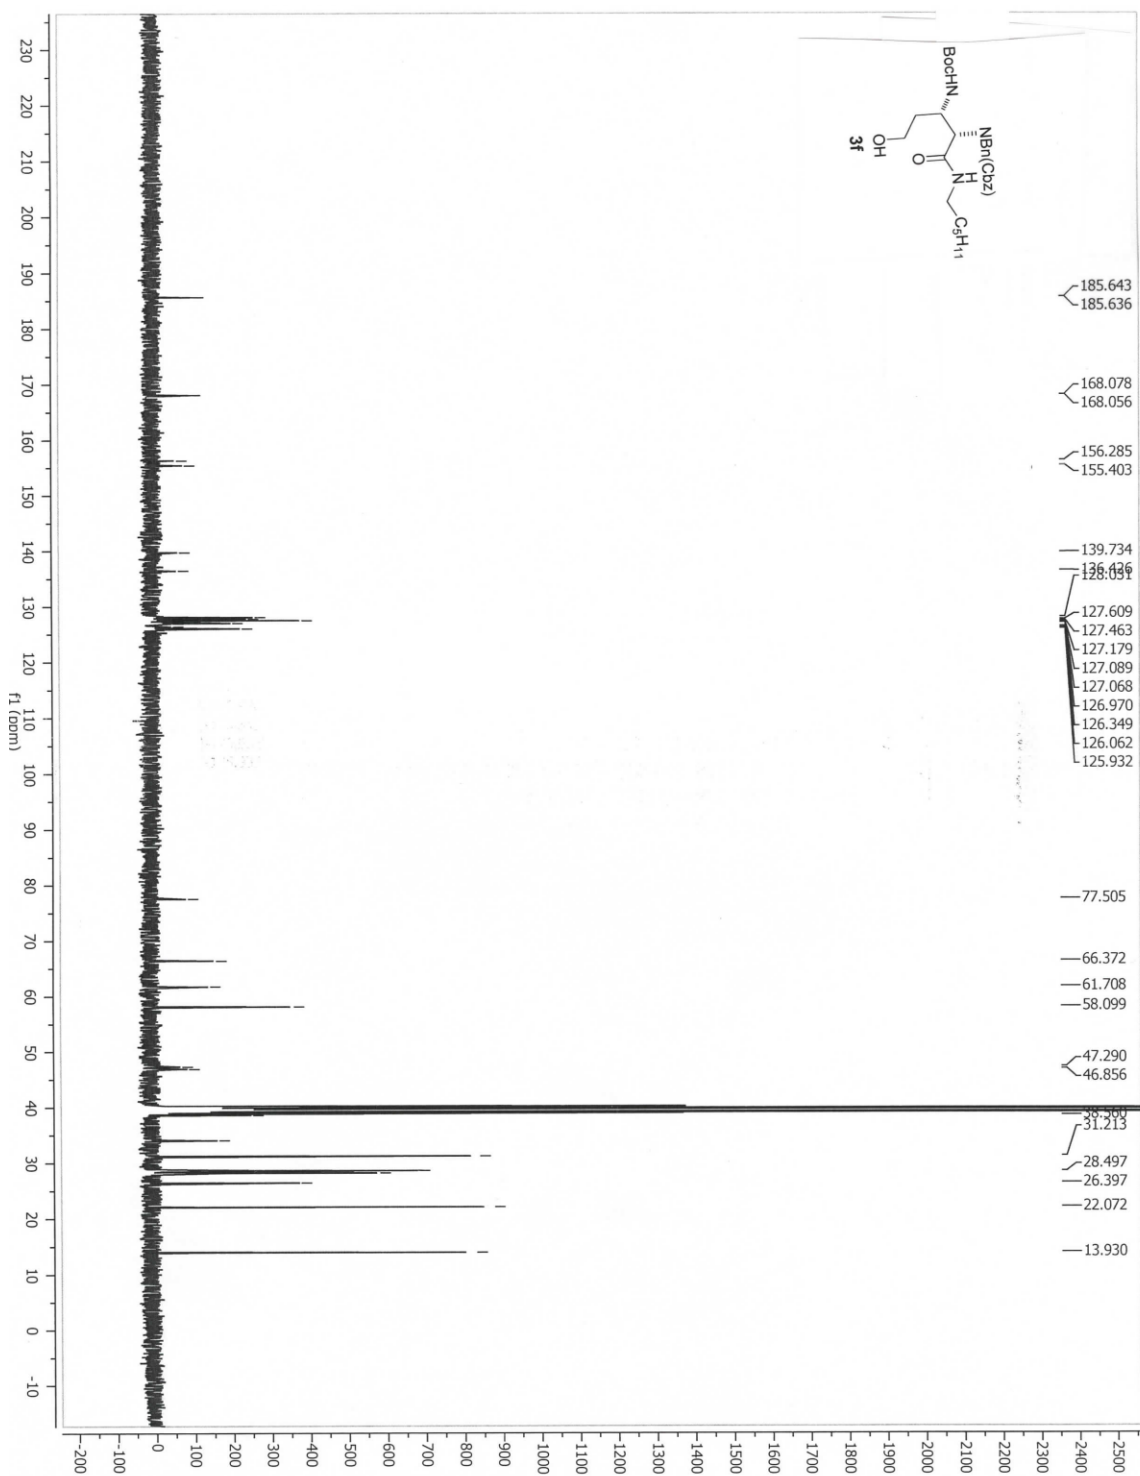

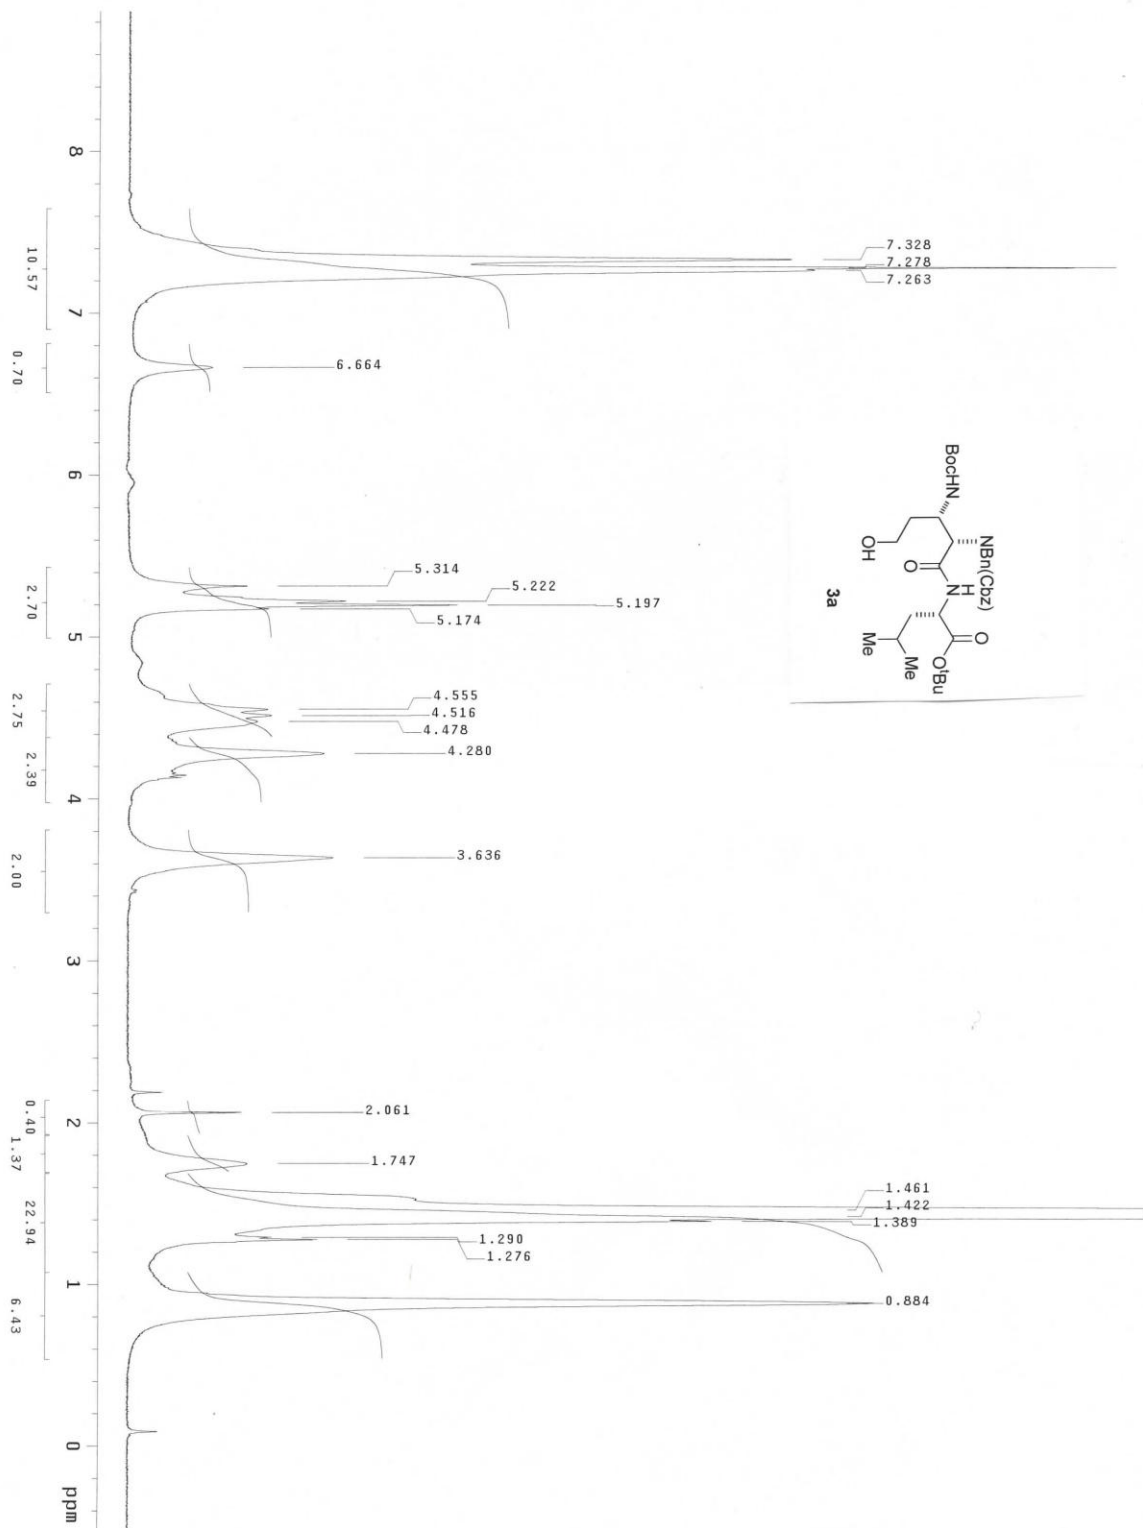

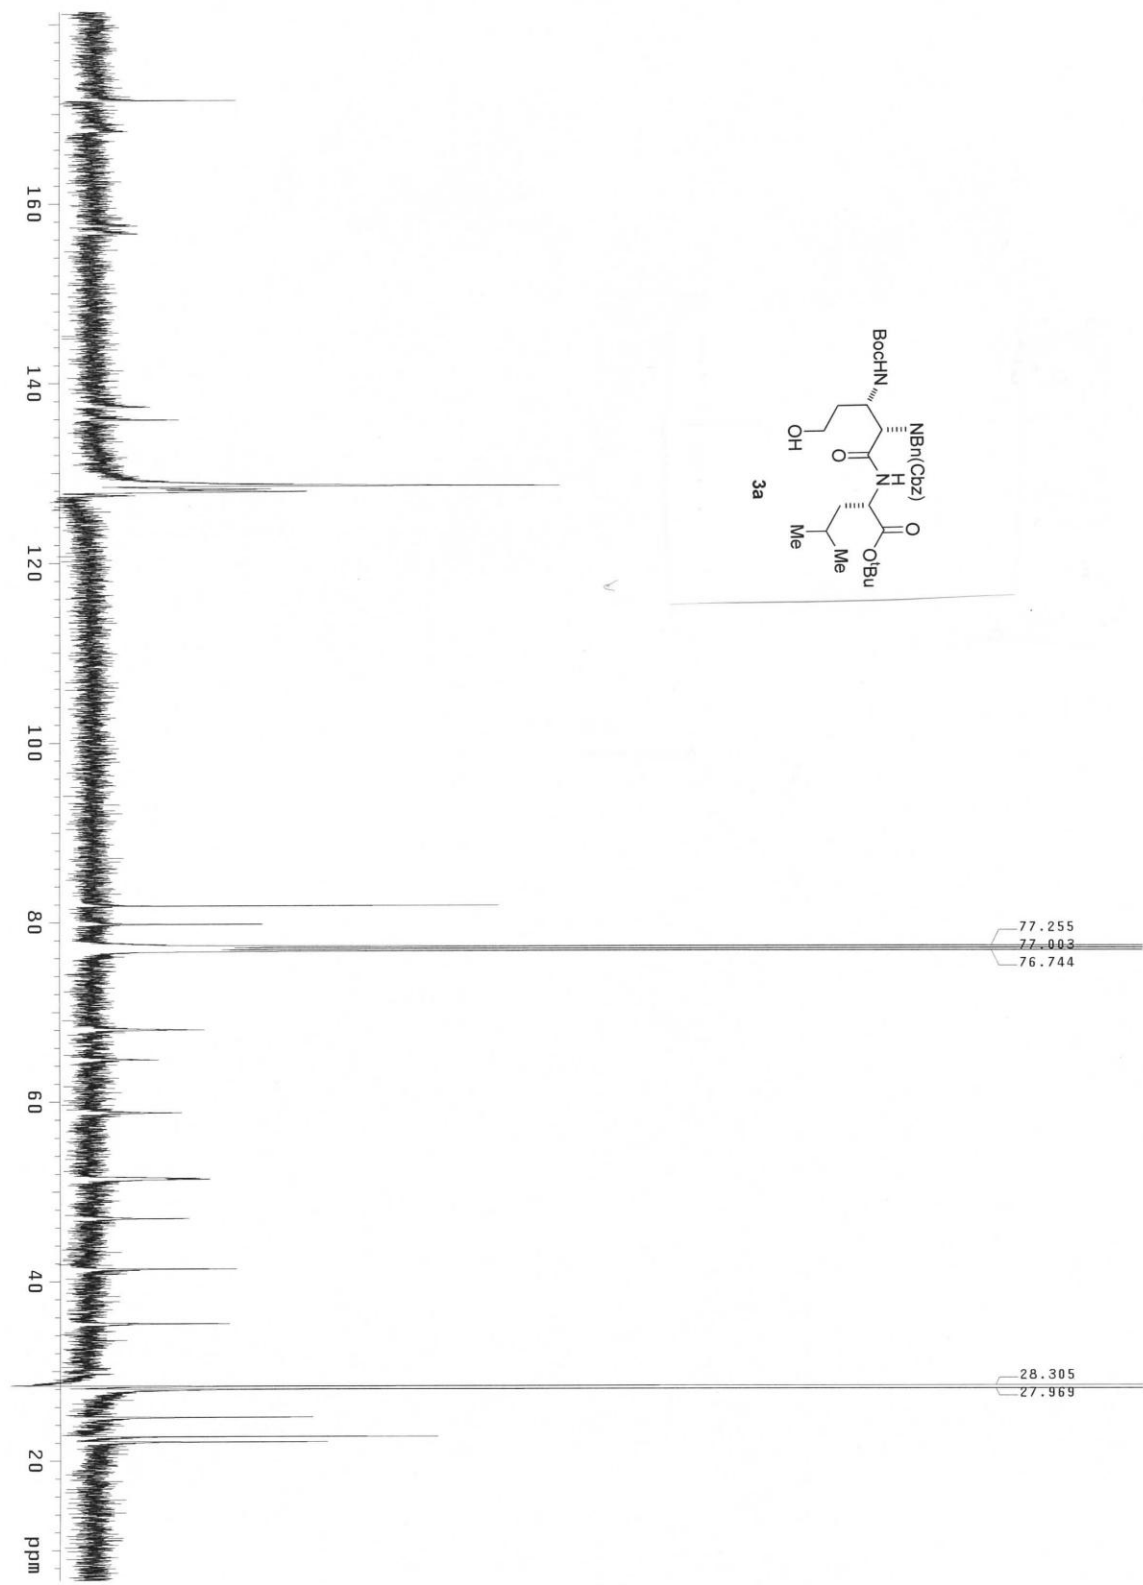



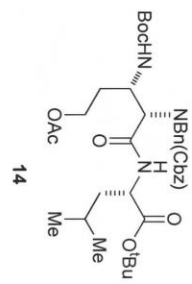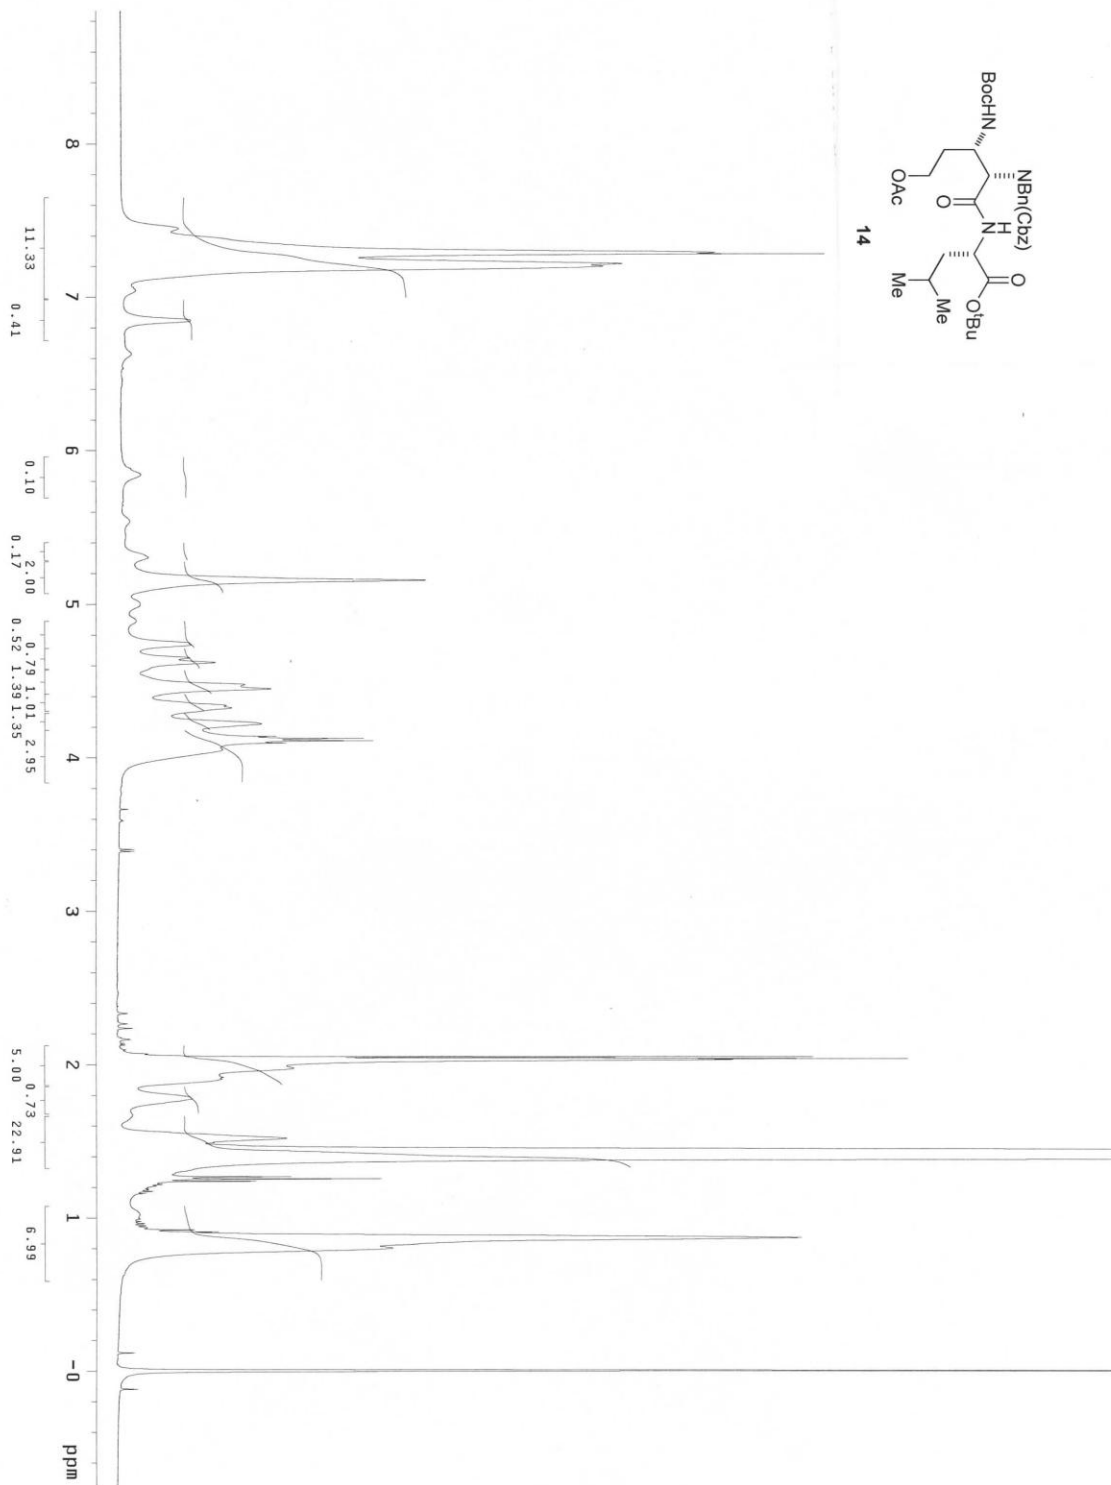

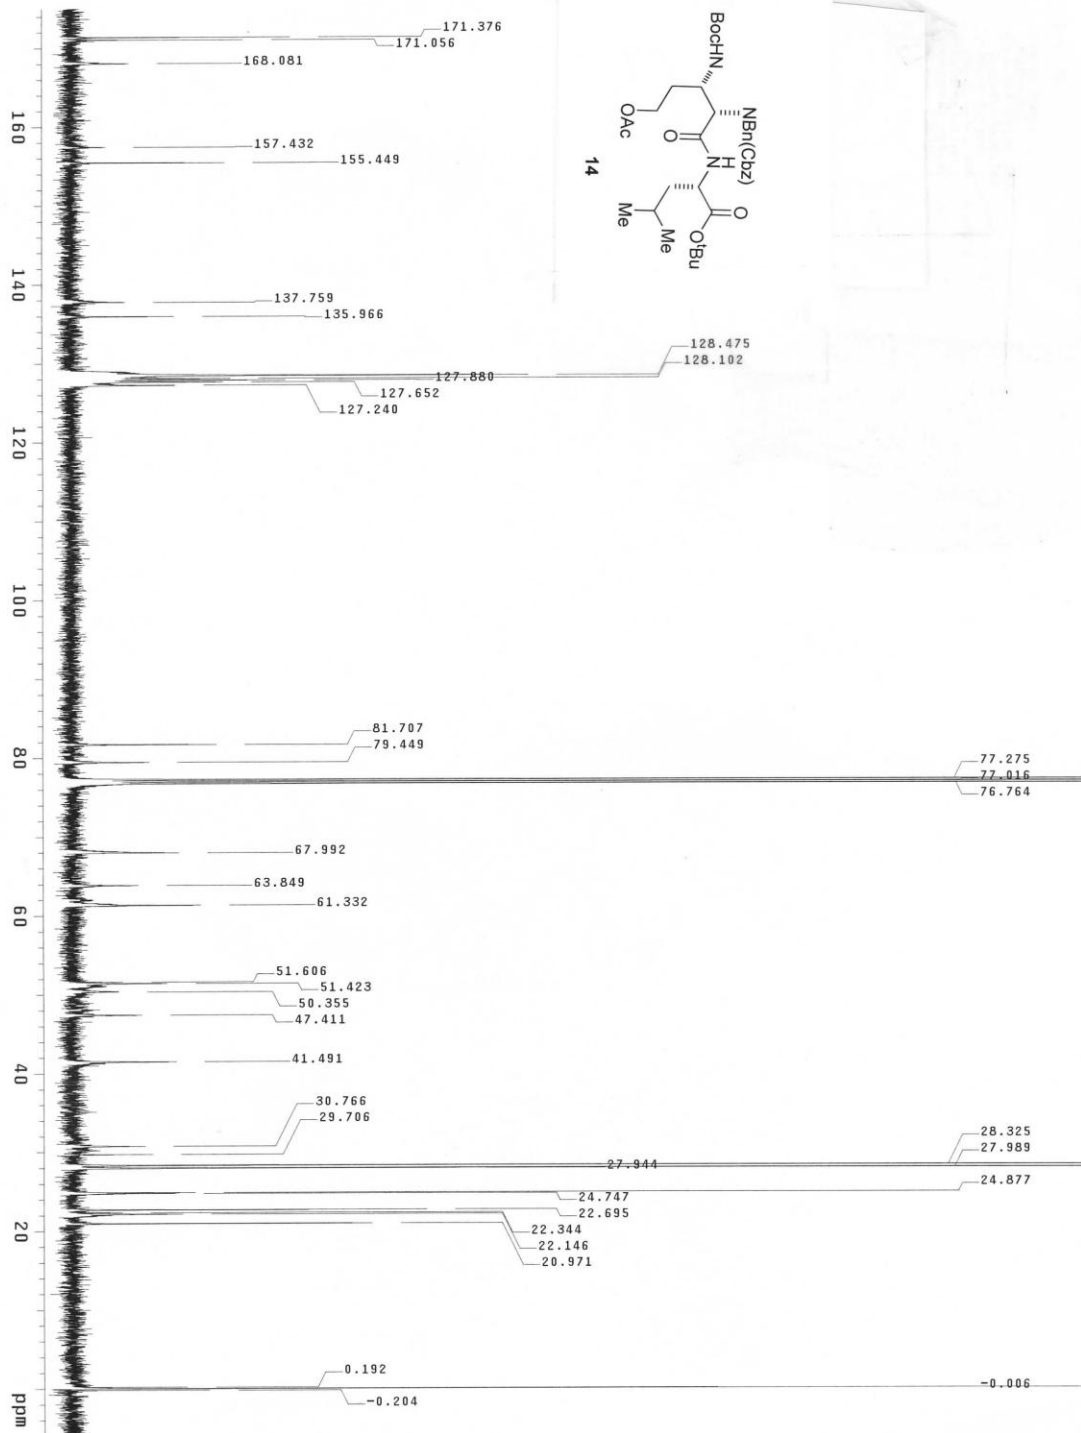





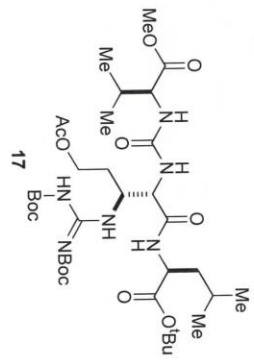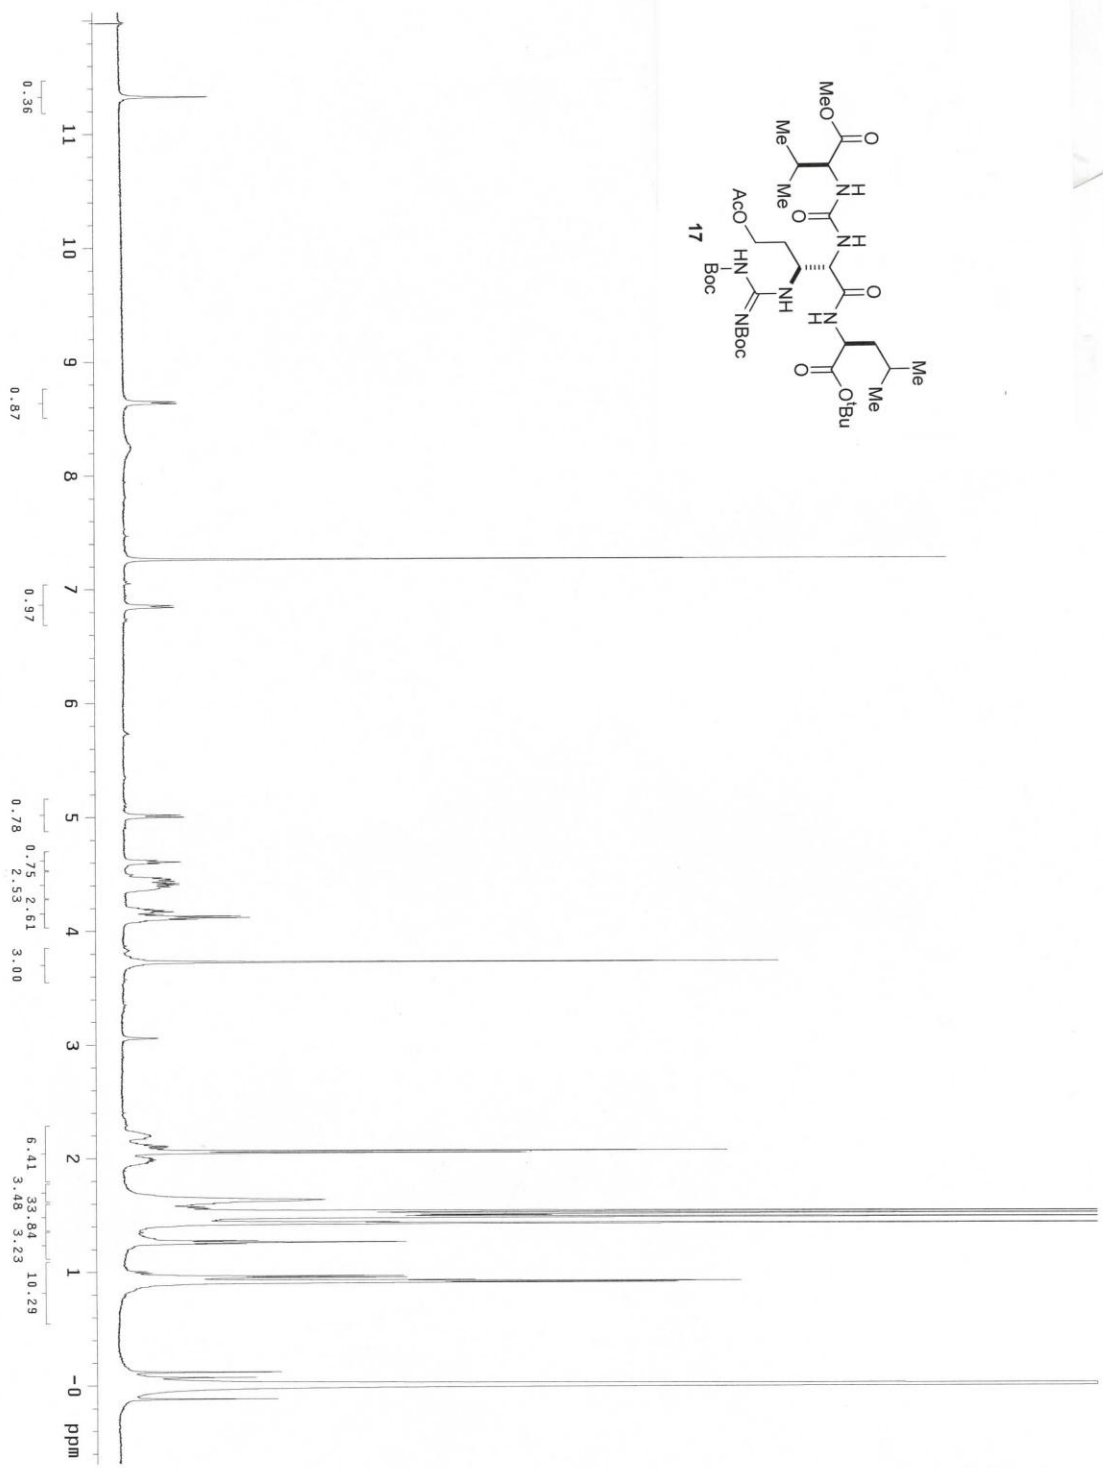









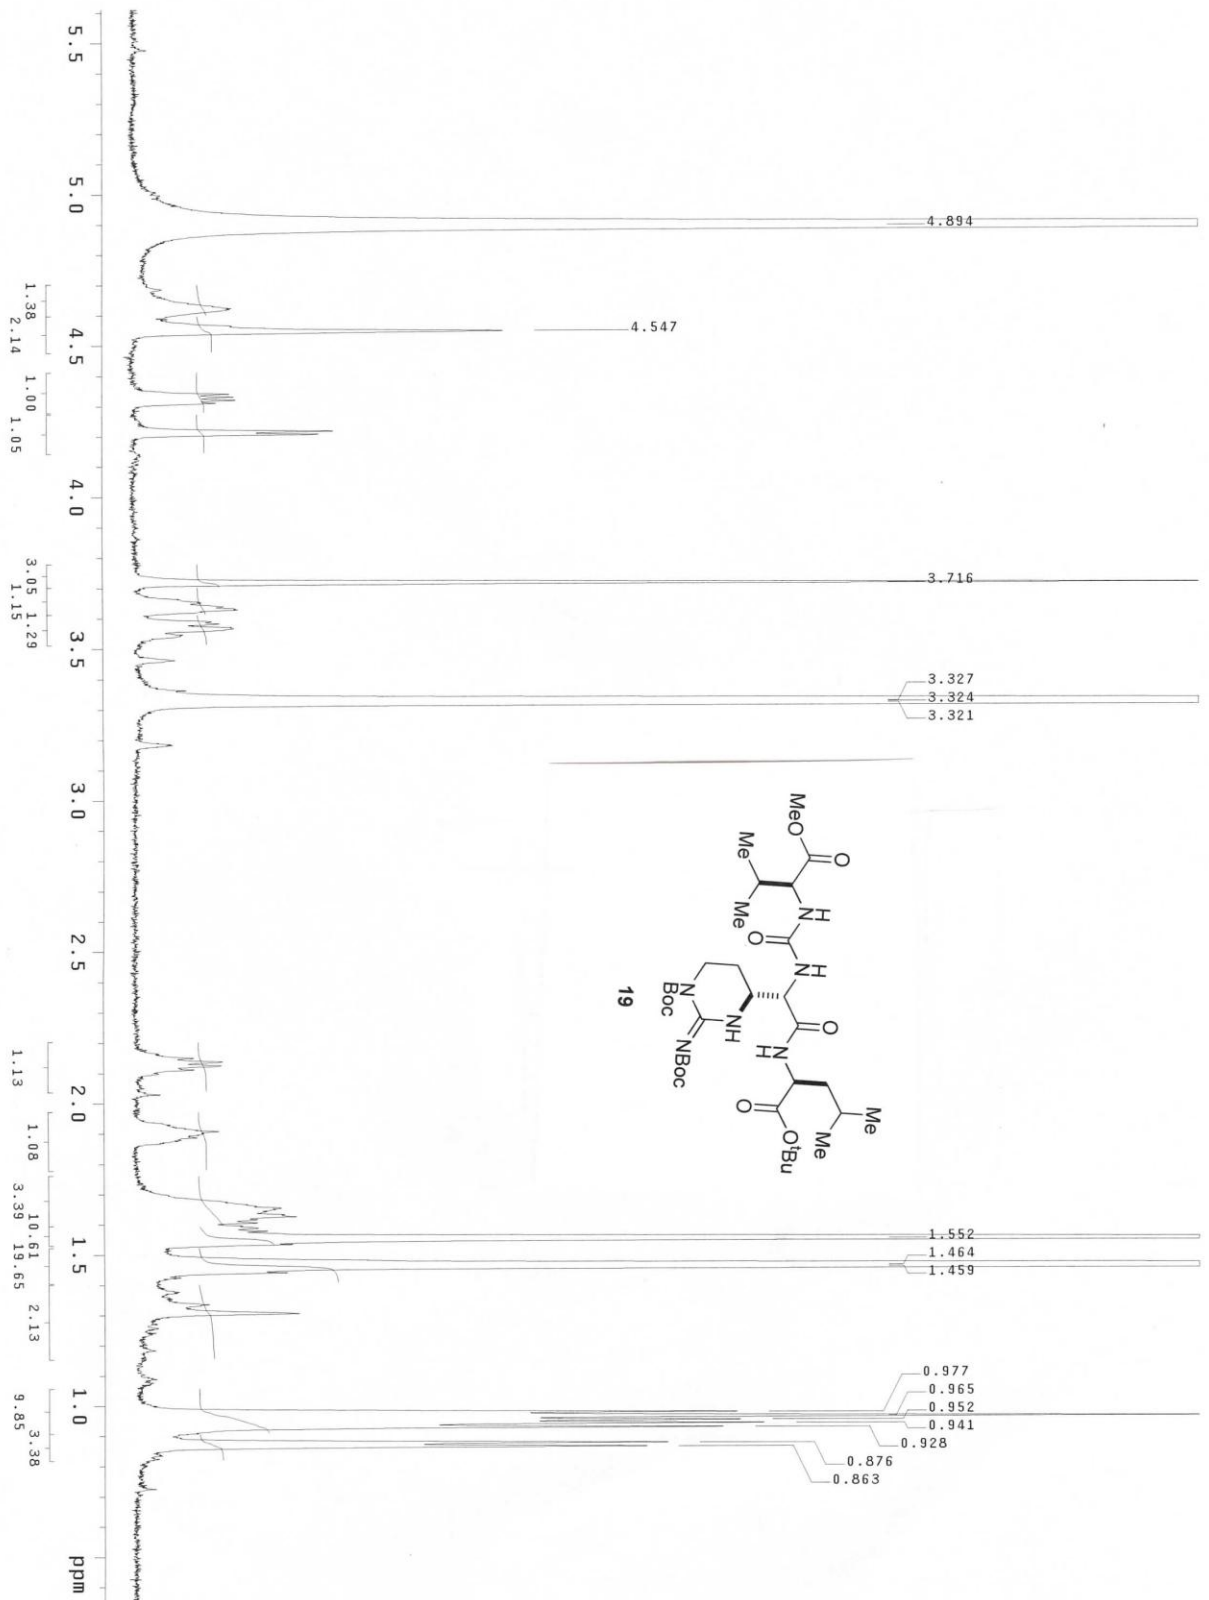

Supplement: NIHMS367575-supplement-SI.pdf [file NIHMS367575-supplement-SI.pdf]
